# Supplementary material for: Clinical characteristics, treatment and outcomes of paediatric COVID-19: a systematic review and meta-analysis
Source: PubMed Central journal article supplement — Arch Dis Child. 2021 Feb 16;106(5):440–8. doi: 10.1136/archdischild-2020-321385 (PMC8070630; doi:10.1136/archdischild-2020-321385), 2021-02-16
Supplement: archdischild-2020-321385supp001.pdf [file archdischild-2020-321385supp001.pdf]

**Clinical characteristics, treatment and outcomes of pediatric COVID-19: a systematic review and meta-analysis****Supplement file**

**Table 1: Search Strategy for MEDLINE**

**Table 2: Distribution of studies (N=129) according to Country of origin included in the review**

**Table 3: Characteristics of included studies (N=129)**

**Table 4: Age Distribution from 91 studies of disease prevalence**

**Table 5: Age Distribution from 67 case series of clinical features and outcomes**

**Table 6: Characteristics of included studies with MIS-C**

**Table 7: Characteristics of included studies from neonatal age group**

**Table 8: Quality assessment of included studies (N=129)**

**Figure 1: Flow diagram of the systematic review process**

**Figure 2: Global map of distribution of the studies included (N=129) in the review**

**Table 1: Search Strategy for MEDLINE**

- 1- (coronavirus or "covid 2019" or "SARS2" or "SARS" or "SARS CoV19" or "severe acute respiratory syndrome coronavirus 2" or "coronavirus infection" or "severe acute respiratory pneumonia outbreak" or "novel cov" or 2019ncov or sars cov2 or cov2 or ncov or covid or covid19 or coronaviridae or "corona virus").mp. [mp=title, abstract, original title, name of substance word, subject heading word, floating sub-heading word, keyword heading word, organism supplementary concept word, protocol supplementary concept word, rare disease supplementary concept word, unique identifier, synonyms]
- 2- "coronavirus infections".mp. or exp Coronavirus Infections/
- 3- exp Coronavirus 229E, Human/ or exp Coronavirus/ or exp Middle East Respiratory Syndrome Coronavirus/ or coronavirus.mp.
- 4- 1 or 2 or 3
- 5- (infant or neonate or newborn or child or children or pediatric\* or paediatric or baby or babies or toddler).mp. [mp=title, abstract, original title, name of substance word, subject heading word, floating sub-heading word, keyword heading word, organism supplementary concept word, protocol supplementary concept word, rare disease supplementary concept word, unique identifier, synonyms]
- 6- exp Infant, Low Birth Weight/ or exp Infant, Extremely Premature/ or exp Infant/ or exp Infant, Newborn/ or exp Infant, Premature/
- 7- 5 or 6
- 8- 4 and 7

**Table 2: Distribution of studies (N=129) according to Country of origin included in the review**

| Country                                                                 | Count of reports | Sum of COVID-19 cases |
|-------------------------------------------------------------------------|------------------|-----------------------|
| USA                                                                     | 24               | 3443                  |
| China                                                                   | 36               | 1315                  |
| Canada                                                                  | 1                | 938                   |
| UK                                                                      | 9                | 867                   |
| Kazakhstan                                                              | 1                | 650                   |
| 25 European Countries                                                   | 1                | 582                   |
| Italy                                                                   | 4                | 171                   |
| Spain                                                                   | 8                | 287                   |
| Korea                                                                   | 1                | 91                    |
| India                                                                   | 5                | 145                   |
| Turkey                                                                  | 3                | 338                   |
| Jordan                                                                  | 1                | 61                    |
| France                                                                  | 4                | 47                    |
| Iran                                                                    | 7                | 152                   |
| Brunei-Darussalam                                                       | 1                | 12                    |
| Chile                                                                   | 1                | 27                    |
| Bangladesh                                                              | 1                | 26                    |
| Brazil                                                                  | 4                | 261                   |
| Pakistan                                                                | 3                | 20                    |
| Poland                                                                  | 1                | 9                     |
| Kuwait                                                                  | 1                | 134                   |
| Saudi Arabia                                                            | 1                | 10                    |
| Australia                                                               | 1                | 4                     |
| Malaysia                                                                | 1                | 4                     |
| Romania                                                                 | 1                | 3                     |
| Japan                                                                   | 1                | 3                     |
| Germany                                                                 | 1                | 3                     |
| Mexico                                                                  | 2                | 53                    |
| South Africa                                                            | 2                | 182                   |
| Peru                                                                    | 1                | 69                    |
| 5 Latin American Countries (Mexico, Colombia, Peru, Costa Rico, Brazil) | 1                | 409                   |

Total

129

10251

Table 3: Characteristics of included studies (N=129)

| Study and year | Country | World Bank Country Classification | Total number (N) | Study setting                   | Mean age (years) | Males (N) | Past medical history and Contact history                              | Presenting signs and symptoms                                                                                                                                   | Management (other than supportive care)                                                                         | Outcomes                                |
|----------------|---------|-----------------------------------|------------------|---------------------------------|------------------|-----------|-----------------------------------------------------------------------|-----------------------------------------------------------------------------------------------------------------------------------------------------------------|-----------------------------------------------------------------------------------------------------------------|-----------------------------------------|
| Qiu, H 2020    | China   | LMIC                              | 36               | Patients presenting to hospital | 8.3              | 23        | Travel history (n=12)<br>Contact history (n=32)<br>Comorbidities (NR) | Fever (n=13), cough (n=7), headache (n=3), nasal symptoms (n=2), GI symptoms (n=2)                                                                              | Interferon (n=36), antivirals (n=14), oxygen (n=6)                                                              | Recovered (n=36)<br>ICU admission (n=0) |
| Wang, D 2020   | China   | LMIC                              | 31               | Patients admitted in hospital   | 7.1              | 15        | Travel history (n=9)<br>Contact history (n=1)<br>Comorbidities (n=0)  | Asymptomatic (n=7), fever (n=20), cough (n=14), fatigue and diarrhea (n=3 each), sore throat (n=2), headache/dizziness (n=3), rhinorrhoea (n=2), vomiting (n=2) | Interferon (n=10), Antibiotics (n=6), antivirals (n=29), traditional medicine (n=9), IVIG (n=4)                 | Recovered (n=24)<br>ICU admission (n=0) |
| Zheng, F 2020  | China   | LMIC                              | 25               | Patients admitted in hospital   | 3.0              | 14        | Travel history (n=9)<br>Contact history (n=1)<br>Comorbidities (n=0)  | Fever (n=13), cough (n=11), diarrhea (n=3), dyspnea (n=2), vomiting (n=2), abdominal pain (n=2), nasal congestion (n=2)                                         | Interferon (n=2), Antibiotics (n=2), antivirals (n=2), steroids (n=2), IVIG (n=4), Mechanical ventilation (n=2) | Recovered (NR)<br>ICU admission (n=2)   |



|                 |       |      |    |                                       |     |    |                                                                                |                                                                                                         |                                                                          |                                         |
|-----------------|-------|------|----|---------------------------------------|-----|----|--------------------------------------------------------------------------------|---------------------------------------------------------------------------------------------------------|--------------------------------------------------------------------------|-----------------------------------------|
| Xia, W<br>2020  | China | LMIC | 20 | Patients admitted<br>in hospital      | 4.8 | 13 | Travel history<br>(n=20)<br>Contact<br>history (n=13)<br>Comorbidities<br>(NR) | Cough (n=13), fever<br>(n=12), diarrhea (n=3),<br>dyspnea (n=2), sore<br>throat (n=1), fatigue<br>(n=1) | NR                                                                       | Recovered (n=19)<br>ICU admission (n=1) |
| Feng, K<br>2020 | China | LMIC | 15 | Patients<br>presenting to<br>hospital | NR  | 5  | Travel history<br>(n=3)<br>Contact<br>history (n=12)<br>Comorbidities<br>(NR)  | Asymptomatic (n=8),<br>fever (n=5), cough or<br>nasal congestion (n=1)                                  | NR                                                                       | Recovered (n=5)<br>ICU admission (n=0)  |
| Cai, J<br>2020  | China | LMIC | 10 | Patients admitted<br>in hospital      | 6.5 | 4  | NR                                                                             | Fever (n=8), cough (n=6)<br>or sore throat or nasal<br>congestion (n=7)                                 | Antibiotics (n=5)                                                        | Recovered (n=10)<br>ICU admission (n=0) |
| Wei, M<br>2020  | China | LMIC | 9  | Patients admitted<br>in hospital      | 0.5 | 2  | Travel history<br>(n=7)<br>Contact<br>history (n=9)<br>Comorbidities<br>(NR)   | Asymptomatic (n=6),<br>fever (n=4), cough (n=2),<br>rhinorrhoea (n=1),<br>sputum production (n=1)       | NR                                                                       | Recovered (n=9)<br>ICU admission (n=0)  |
| Su, L<br>2020   | China | LMIC | 9  | Patients<br>presenting to<br>hospital | 4.5 | 3  | Travel history<br>(n=8)<br>Contact<br>history (n=9)<br>Comorbidities<br>(NR)   | Asymptomatic (n=6),<br>fever or cough (n=3)                                                             | Interferon given to all<br>patients; antivirals<br>(n=2)                 | Recovered (NR)<br>ICU admission (n=0)   |
| Zhou, Y<br>2020 | China | LMIC | 9  | Patients admitted<br>in hospital      | 1.0 | 4  | Travel history<br>(n=3)<br>Contact<br>history (n=9)<br>Comorbidities<br>(n=0)  | Asymptomatic (n=5),<br>fever (n=4), cough (n=2),<br>rhinorrhoea (n=1)                                   | Interferon (n=9)<br>antivirals (n=6),<br>mechanical ventilation<br>(n=9) | Recovered (NR)<br>ICU admission (n=0)   |
| Sun, D<br>2020  | China |      | 8  |                                       | 6.8 | 6  | Travel history<br>(n=8)                                                        | Fever or cough (n=6<br>each), sputum<br>production (n=4),                                               | mechanical ventilation<br>(n=2), antibiotics (n=5),                      | Recovered (n=5)                         |

|               |       |      |   |                                 |     |   |                                                                     |                                                                                                              |                                                                               |                                        |
|---------------|-------|------|---|---------------------------------|-----|---|---------------------------------------------------------------------|--------------------------------------------------------------------------------------------------------------|-------------------------------------------------------------------------------|----------------------------------------|
|               |       | LMIC |   | Patients admitted in hospital   |     |   | Contact history (n=5)<br>Comorbidities (n=3)                        | nausea/ vomiting (n=4), diarrhea (n=3), fatigue (n=1) or headache (n=1), sore throat or nasal symptoms (n=8) | systemic steroids (n=5), IVIG (n=4), Chinese medications (n=4)                | ICU admission (n=8)                    |
| Liu, W 2020   | China | LMIC | 6 | Patients admitted in hospital   | 3.0 | 2 | NR                                                                  | High fever and cough in all patients; vomiting and fatigue (n=4)                                             | Antivirals (n=6), systemic steroids (n=4), IVIG (n=1)                         | Recovered (n=5)<br>ICU admission (n=1) |
| Hu, Z 2020    | China | LMIC | 7 | Patients admitted in hospital   | 8.0 | 5 | Travel history (n=3)<br>Contact history (n=0)<br>Comorbidities (NR) | Asymptomatic (n=4), fever (n=1)                                                                              | NR                                                                            | Recovered (n=6)<br>ICU admission (NR)  |
| Liu, M 2020   | China | LMIC | 5 | Patients admitted in hospital   | 5.9 | 4 | Travel history (n=0)<br>Contact history (n=5)<br>Comorbidities (NR) | Fever (n=2), cough (n=2), diarrhea (n=1), asymptomatic (n=3)                                                 | Antiviral (n=3), Interferon (n=4)                                             | Recovered (n=5)<br>ICU admission (n=0) |
| Liu, H 2020   | China | LMIC | 4 | Patients presenting to hospital | 3.0 | 2 | Travel history (n=4)<br>Contact history (n=4)<br>Comorbidities (NR) | Fever (n=3), cough (n=3), Fatigue (n=1)                                                                      | NR                                                                            | NR                                     |
| Lou, MX 2020  | China | LMIC | 3 | Patients admitted in hospital   | 4.8 | 1 | Travel history (n=2)<br>Contact history (n=3)<br>Comorbidities (NR) | Fever (n=3), cough (n=1), Fatigue (n=2), diarrhea (n=2), nasal symptoms or sore throat (n=2)                 | Antibiotics (n=1), interferon (n=2)                                           | Recovered (n=3)<br>ICU admission (n=0) |
| Zhang, T 2020 | China | LMIC | 3 | Patients admitted in hospital   | 7.7 | 3 | Travel history (n=0)<br>Contact history (n=3)                       | Fever (n=2), cough (n=1), Fatigue (n=1), nausea or vomiting (n=2), nasal symptoms or sore throat (n=3)       | Antibiotics (n=1), antivirals (n=1), interferon (n=3), Chinese medicine (n=3) | Recovered (n=3)<br>ICU admission (NR)  |

|                 |          |      |    |                                 |      |    | Comorbidities (NR)                                                    |                                                                                         |                                                      |                                         |
|-----------------|----------|------|----|---------------------------------|------|----|-----------------------------------------------------------------------|-----------------------------------------------------------------------------------------|------------------------------------------------------|-----------------------------------------|
| Li, Y 2020      | China    | LMIC | 2  | Patients admitted in hospital   | 4.0  | 1  | Travel history (n=2)<br>Contact history (n=2)<br>Comorbidities (n=0)  | Cough (n=1), nasal symptoms (n=1), asymptomatic (n=1)                                   | NR                                                   | Recovered (NR)<br>ICU admission (NR)    |
| Ji, LN 2020     | China    | LMIC | 2  | Patients admitted in hospital   | 12.0 | 2  | Travel history (n=2)<br>Contact history (n=2)<br>Comorbidities (n=0)  | Fever (n=1), nasal symptoms (n=1), sore throat (n=1)                                    | NR                                                   | Recovered (NR)<br>ICU admission (n=0)   |
| Tagarro, A 2020 | Spain    | HIC  | 41 | Patients admitted in hospital   | 4.3  | 18 | Travel history (NR)<br>Contact history (n=16)<br>Comorbidities (n=2)  | Upper respiratory symptoms in 14 (34%), fever (n=11), gastroenteritis or vomiting (n=2) | Mechanical ventilation (n=4)                         | Recovered (n=37)<br>ICU admission (n=4) |
| Chen, A 2020    | China    | LMIC | 14 | Patients admitted in hospital   | 4.3  | 8  | Travel history (n=10)<br>Contact history (n=4)<br>Comorbidities (n=0) | Fever (n=6), cough (n=6), Fatigue (n=3), nasal symptoms or sore throat (n=2)            | NR                                                   | NR                                      |
| See, KC 2020    | Malaysia | LMIC | 4  | Patients presenting to hospital | 6.4  | 3  | Travel history (n=4)<br>Contact history (n=0)<br>Comorbidities (N=1)  | Fever (n=1), cough (n=2), diarrhea (n=1), asymptomatic (n=2)                            | Antibiotics (n=1)                                    | Recovered (n=4)<br>ICU admission (n=0)  |
| Zhang, GX 2020  | China    | LMIC | 2  | Patients admitted in hospital   | 1.2  | 0  | Travel history (n=0)<br>Contact history (n=2)                         | Fever (n=2), fatigue (n=1), dyspnea (n=1), diarrhea (n=2), nausea or vomiting (n=2),    | IVIg (n=1), interferon (n=2), Chinese medicine (n=1) | Recovered (n=2)<br>ICU admission (n=0)  |

|               |       |      |    |                               |     |    |                                                                        |                                                                                                                                                    |                                                                          |                                         |
|---------------|-------|------|----|-------------------------------|-----|----|------------------------------------------------------------------------|----------------------------------------------------------------------------------------------------------------------------------------------------|--------------------------------------------------------------------------|-----------------------------------------|
|               |       |      |    |                               |     |    | Comorbidities (n=0)                                                    |                                                                                                                                                    |                                                                          |                                         |
| Cheng, X 2020 | China | LMIC | 2  | Patients admitted in hospital | 1.0 | 1  | Travel history (n=2)<br>Contact history (n=0)<br>Comorbidities (n=0)   | Fever (n=2), fatigue (n=1), dyspnea (n=1), diarrhea (n=2), nausea or vomiting (n=2),                                                               | Antibiotics (n=2), interferon (n=1), Chinese medicine (n=1)              | Recovered (n=2)<br>ICU admission (n=1)  |
| Tang, A 2020  | China | LMIC | 26 | Patients admitted in hospital | 6.9 | 17 | Travel history (n=26)<br>Contact history (n=26)<br>Comorbidities (n=0) | Fever (n=11), cough (n=12), diarrhea (n=2), nausea or vomiting (n=2), nasal symptoms or sore throat (n=2), asymptomatic (n=9)                      | Antivirals (n=22), interferon (n=4)                                      | Recovered (n=17)<br>ICU admission (n=0) |
| Zhu, L 2020   | China | LMIC | 10 | Patients admitted in hospital | 9.1 | 1  | Travel history (n=8)<br>Contact history (n=10)<br>Comorbidities (n=0)  | Fever (n=3), cough (n=3), asymptomatic (n=6)                                                                                                       | Antivirals (n=1), interferon (n=10)                                      | Recovered (n=10)<br>ICU admission (n=0) |
| Tan, X 2020   | China | LMIC | 13 | Patients admitted in hospital | 7.9 | 4  | Travel history (n=3)<br>Contact history (n=10)<br>Comorbidities (n=0)  | Fever (n=6), cough (n=6), nasal symptoms (n=1), diarrhea (n=1), nausea or vomiting (n=1), abdominal pain (n=1), headache (n=1), asymptomatic (n=2) | Antivirals (n=12), interferon (n=10)                                     | Recovered (n=13)<br>ICU admission (n=0) |
| Ma, H 2020    | China | LMIC | 22 | Patients admitted in hospital | 5.5 | 12 | Travel history (n=22)<br>Contact history (n=0)<br>Comorbidities (n=0)  | Fever (n=13), dry cough (n=5), shortness of breath (n=1), asymptomatic (n=2)                                                                       | NR                                                                       | Recovered (n=5)<br>ICU admission (n=0)  |
| Shen, Q 2020  | China | LMIC | 9  | Patients admitted in hospital | 7.6 | 3  | Travel history (n=2)<br>Contact history (n=6)                          | asymptomatic (n=2), fever (n=3), diarrhea (n=2), sore throat (n=1), cough (n=1)                                                                    | Antivirals (n=9), antibiotics (n=4), IVIG (n=1), Systemic steroids (n=1) | Recovered (n=6)<br>ICU admission (n=0)  |

|                              |         |      |    |                                                 |      |    |                                                                     |                                                                                                                    |                                                                                                        |                                                         |
|------------------------------|---------|------|----|-------------------------------------------------|------|----|---------------------------------------------------------------------|--------------------------------------------------------------------------------------------------------------------|--------------------------------------------------------------------------------------------------------|---------------------------------------------------------|
|                              |         |      |    |                                                 |      |    | Comorbidities (n=0)                                                 |                                                                                                                    |                                                                                                        |                                                         |
| Schwierz<br>eck, V<br>2020   | Germany | HIC  | 3  | Patients admitted<br>in hospital                | 10.0 | NR | Travel history (n=0)<br>Contact history (NR)<br>Comorbidities (n=3) | Asymptomatic (n=2),<br>fever (n=1), cough (n=1),<br>nasal congestion (n=1)                                         | NR                                                                                                     | NR                                                      |
| Jiang, JY<br>2020            | China   | LMIC | 6  | Patients<br>presenting to<br>hospital           | 7.0  | 5  | Travel history (n=0)<br>Contact history (n=6)<br>Comorbidities (NR) | Fever (n=3), cough (n=2),<br>diarrhea (n=3),<br>asymptomatic (n=3)                                                 | NR                                                                                                     | Recovered (n=6)<br>ICU admission (n=0)                  |
| Riphagen<br>, S 2020         | UK      | HIC  | 8  | Patients admitted<br>in hospital                | 8.9  | 5  | Travel history (NR)<br>Contact history (NR)<br>Comorbidities (NR)   | Fever (n=8), diarrhea (n=7),<br>rashes (n=4),<br>conjunctivitis (n=5)                                              | IVIg (n=6), Systemic<br>steroids (n=5),<br>Inotropes (n=8), aspirin (n=3)                              | Recovered (n=7)<br>ICU admission (n=8)<br>Death (n=1)   |
| Shekerde<br>mian, LS<br>2020 | USA     | HIC  | 48 | Patients admitted<br>to intensive care<br>units | 11.7 | 25 | Travel history (NR)<br>Contact history (NR)<br>Comorbidities (n=40) | Multi-organ failure (n=11),<br>pulmonary symptoms (n=35),<br>diarrhea (n=1), headache (n=2),<br>asymptomatic (n=1) | hydroxychloroquine (n=21),<br>antiviral (n=8),<br>mechanical ventilation (n=18),<br>antibiotics (n=15) | Recovered (n=31)<br>ICU admission (n=48)<br>Death (n=2) |
| Verdoni,<br>L 2020           | Italy   | HIC  | 10 | Patients admitted<br>in hospital                | 7.5  | 7  | Travel history (NR)<br>Contact history (NR)<br>Comorbidities (n=5)  | GI symptoms (n=5),<br>neurological (n=4),<br>Kawasaki signs (n=12),<br>rashes (n=5)                                | IVIg (n=8), Inotropes (n=2)                                                                            | Recovered (n=10)<br>ICU admission (n=0)                 |
| Rahimza<br>deh, G<br>2020    | Iran    | LMIC | 9  | Patients admitted<br>in hospital                | 4.9  | 6  | Travel history (n=0)<br>Contact history (n=0)                       | Fever (n=9), cough (n=9),<br>fatigue (n=9),<br>asymptomatic (n=3)                                                  | Mechanical ventilation (n=2),<br>antivirals (n=9),<br>antibiotics (n=9),<br>antimalarials (n=9)        | Recovered (n=9)<br>ICU admission (n=2)                  |

|                   |          |      |    |                                 |          |    |                                                                       |                                                                                         |                                                 |                                         |
|-------------------|----------|------|----|---------------------------------|----------|----|-----------------------------------------------------------------------|-----------------------------------------------------------------------------------------|-------------------------------------------------|-----------------------------------------|
|                   |          |      |    |                                 |          |    | Comorbidities (n=0)                                                   |                                                                                         |                                                 |                                         |
| Tullie, L 2020    | UK       | HIC  | 8  | Patients admitted in hospital   | NR       | NR | NR                                                                    | Fever (n=8), Kawasaki signs (n=4), rashes (n=4), GI symptoms (n=8)                      | antibiotics (n=8), IVIG (n=4)                   | Recovered (n=7)<br>ICU admission (n=4)  |
| Sajid, MI 2020    | Pakistan | LMIC | 2  | Patients admitted in hospital   | 12.0     | 1  | Travel history (NR)<br>Contact history (NR)<br>Comorbidities (n=2)    | Fever (n=2), cough (n=1)                                                                | NR                                              | Recovered (NR)<br>ICU admission (n=0)   |
| Zhang, ZJ 2020    | China    | LMIC | 4  | Patients admitted in hospital   | Newborns | 3  | Travel history (NR)<br>Contact history (NR)<br>Comorbidities (n=2)    | Fever (n=2), shortness of breath (n=1), cough (n=1), vomiting (n=1), asymptomatic (n=1) | NR                                              | Recovered (NR)<br>ICU admission (n=0)   |
| Zeng, L 2020      | China    | LMIC | 3  | Patients admitted in hospital   | Newborns | 3  | Travel history (n=3)<br>Contact history (n=3)<br>Comorbidities (n=0)  | Fever (n=2), cough (n=1), fatigue (n=1)                                                 | Mechanical ventilation (n=1), antibiotics (n=1) | Recovered (NR)<br>ICU admission (n=3)   |
| Salvatori, G 2020 | Italy    | HIC  | 2  | Patients presenting to hospital | Newborns | 1  | Travel history (NR)<br>Contact history (NR)<br>Comorbidities (n=0)    | Cough (n=1), fatigue (n=1), diarrhea (n=1), asymptomatic (n=1)                          | NR                                              | Recovered (n=2)<br>ICU admission (n=0)  |
| Zhang, X 2020     | China    | LMIC | 10 | Patients presenting to hospital | 4.9      | 3  | Travel history (n=0)<br>Contact history (n=10)<br>Comorbidities (n=0) | Fever (n=3), Cough (n=1), sore throat (n=1), asymptomatic (n=5)                         | NR                                              | Recovered (n=10)<br>ICU admission (n=0) |
| Wu, HP 2020       | China    |      | 23 |                                 | NR       | NR | Travel history (n=7)                                                  | Fever (n=16), Cough (n=11), diarrhea (n=2),                                             | Antivirals (n=8), antibiotics (n=6),            | Recovered (n=23)<br>ICU admission (n=0) |

|                       |        |      |    |                                 |      |    |                                                                        |                                                                                                                                                      |                                                                     |                                                          |
|-----------------------|--------|------|----|---------------------------------|------|----|------------------------------------------------------------------------|------------------------------------------------------------------------------------------------------------------------------------------------------|---------------------------------------------------------------------|----------------------------------------------------------|
|                       |        | LMIC |    | Patients admitted in hospital   |      |    | Contact history (n=17)<br>Comorbidities (n=0)                          | sore throat (n=2), asymptomatic (n=3)                                                                                                                | interferon (n=17), antimalarial (n=1)                               |                                                          |
| Zhang, H 2020         | China  | LMIC | 2  | Patients presenting to hospital | 13.5 | 2  | Travel history (n=2)<br>Contact history (n=2)<br>Comorbidities (n=2)   | Fever (n=1), Cough (n=1), asymptomatic (n=1)                                                                                                         | Antivirals (n=2), antibiotics (n=1), interferon (n=2)               | Recovered (n=2)<br>ICU admission (n=0)                   |
| Chao, JY 2020         | USA    | HIC  | 46 | Patients admitted in hospital   | 13.1 | 31 | Travel history (n=0)<br>Contact history (n=20)<br>Comorbidities (n=31) | Fever (n=28), Cough (n=28), dyspnea (n=22) asymptomatic (n=1)                                                                                        | NR                                                                  | Recovered (n=45)<br>ICU admission (n=13)<br>Deaths (n=1) |
| Eghbali, A 2020       | Iran   | LMIC | 4  | Patients admitted in hospital   | 11.0 | 4  | Travel history (NR)<br>Contact history (NR)<br>Comorbidities (n=2)     | Fever (n=4), Cough (n=4), dyspnea (n=2)                                                                                                              | Mechanical ventilation (n=2)                                        | Recovered (n=4)<br>ICU admission (n=2)                   |
| Chiotos, K 2020       | USA    | HIC  | 6  | Patients admitted in hospital   | 8.5  | 1  | Travel history (n=0)<br>Contact history (n=0)<br>Comorbidities (n=0)   | Fever (n=6), diarrhea (n=6), nausea of vomiting (n=5), abdominal pain (n=5), dyspnea (n=4), kawasaki signs (n=6), rashes (n=2), conjunctivitis (n=2) | IVIG (N=6), Systemic steroids (n=3), inotropes (n=6), aspirin (n=3) | Recovered (n=5)<br>ICU admission (n=1)                   |
| Flores, V 2020        | Mexico | LMIC | 3  | Patients admitted in hospital   | 7.0  | 0  | Travel history (NR)<br>Contact history (n=0)<br>Comorbidities (n=3)    | Fever (n=3), dyspnea (n=1)                                                                                                                           | Mechanical ventilation (n=1), Antibiotics (n=3)                     | Recovered (n=2)<br>ICU admission (n=1)<br>Deaths (n=1)   |
| García-Salido, A 2020 | Spain  |      | 7  | Patients admitted in hospital   | 8.4  | 4  | Travel history (NR)                                                    | Fever (n=5), dyspnea (n=3), diarrhea (n=3), nausea or vomiting (n=3)                                                                                 | Antivirals (n=6), antibiotics (n=6), IVIG                           | Recovered (n=7)<br>ICU admission (n=7)                   |

|                           |        |      |    |                                           |      |    |                                                                      |                                                                                                                           |                                                                                                                            |                                                         |
|---------------------------|--------|------|----|-------------------------------------------|------|----|----------------------------------------------------------------------|---------------------------------------------------------------------------------------------------------------------------|----------------------------------------------------------------------------------------------------------------------------|---------------------------------------------------------|
|                           |        | HIC  |    | Patients admitted to intensive care units |      |    | Contact history (NR)<br>Comorbidities (n=1)                          |                                                                                                                           | (n=2), systemic steroids (n=6), antimalarial (n=6), interferon (n=2)                                                       |                                                         |
| Cabrero-Hernández, M 2020 | Spain  | HIC  | 5  | Patients admitted to intensive care units | 10.6 | 4  | Travel history (NR)<br>Contact history (NR)<br>Comorbidities (n=0)   | Fever (n=5), diarrhea (n=3), nausea or vomiting (n=2), abdominal pain (n=5), Kawasaki signs (n=1), rashes (n=1)           | Mechanical ventilation (n=5), Systemic steroids (n=5), antimalarial (n=5), inotropes (n=4)                                 | Recovered (n=5)<br>ICU admission (n=5)                  |
| Waltuch, T 2020           | USA    | HIC  | 4  | Patients admitted to intensive care units | 10.0 | 3  | Travel history (n=0)<br>Contact history (n=2)<br>Comorbidities (n=2) | Fever (n=4), Cough (n=2), fatigue (n=2), GI symptoms (n=3), Kawasaki signs (n=2), rashes (n=2), conjunctivitis (n=1)      | Antibiotics (n=4), IVIG (n=2), Inotropes (n=1)                                                                             | Recovered (n=4)<br>ICU admission (n=4)                  |
| Kakuya, F 2020            | Japan  | HIC  | 3  | Patients presenting to hospital           | 8.3  | 3  | Travel history (n=0)<br>Contact history (n=1)<br>Comorbidities (n=0) | Fever (n=3), Cough (n=3), fatigue (n=1),                                                                                  | Antibiotics (n=2)                                                                                                          | Recovered (n=3)<br>ICU admission (n=0)                  |
| Soltani, J 2020           | Iran   | LMIC | 30 | Patients presenting to hospital           | 6.0  | 14 | Travel history (NR)<br>Contact history (NR)<br>Comorbidities (n=11)  | Fever (n=23), Cough (n=16), dyspnea (n=20), diarrhea (n=3), nausea or vomiting (n=8), nasal symptoms or sore throat (n=6) | Antivirals (n=19), antibiotics (n=17), IVIG (n=2), antimalarial (n=23)                                                     | Recovered (n=29)<br>ICU admission (n=1)<br>Deaths (n=1) |
| Toubiana, J 2020          | France | HIC  | 21 | Patients admitted in hospital             | 7.9  | 9  | Travel history (NR)<br>Contact history (NR)<br>Comorbidities (n=0)   | Fever (n=11), GI Symptoms (n=21), neurological (n=6), kawasaki signs (n=11), rashes (n=16), conjunctivitis (n=17)         | Mechanical ventilation (n=11), Antibiotics (n=18), IVIG (N=21), Systemic steroids (n=10), Inotropes (n=15), aspirin (n=21) | Recovered (n=21)<br>ICU admission (n=17)                |
| Foster, CE 2020           | USA    | HIC  | 57 | Patients presenting to hospital           | 10.6 | 31 | Travel history (n=3)<br>Contact history (n=30)                       | Fever (n=35), cough (n=34), GI Symptoms (n=21), sore throat or                                                            | Antibiotics (n=3), systemic steroids (n=3), IVIG (n=1),                                                                    | Recovered (n=57)<br>ICU admission (n=0)                 |



|                   |        |      |    |                                 |      |   |                                                                       |                                                                                                         |                                                                                                   |                                         |
|-------------------|--------|------|----|---------------------------------|------|---|-----------------------------------------------------------------------|---------------------------------------------------------------------------------------------------------|---------------------------------------------------------------------------------------------------|-----------------------------------------|
|                   |        |      |    |                                 |      |   | Comorbidities (n=21)                                                  | nasal symptoms (n=16), asymptomatic (n=3)                                                               |                                                                                                   |                                         |
| White, A 2020     | USA    | HIC  | 3  | Patients admitted in hospital   | 0.1  | 2 | Travel history (n=0)<br>Contact history (n=2)<br>Comorbidities (n=0)  | Fever (n=3), dyspnea (n=3), nasal symptoms (n=3)                                                        | NR                                                                                                | Recovered (n=3)<br>ICU admission (n=3)  |
| Lin, EE 2020      | USA    | HIC  | 12 | Patients admitted in hospital   | 11.3 | 8 | Travel history (n=0)<br>Contact history (n=2)<br>Comorbidities (n=0)  | Fever (n=3), cough (n=1), GI Symptoms (n=1), sore throat (n=2),                                         | NR                                                                                                | Recovered (NR)<br>ICU admission (n=0)   |
| Gao, Y 2020       | China  | LMIC | 11 | Patients presenting to hospital | 10.3 | 6 | Travel history (n=0)<br>Contact history (n=10)<br>Comorbidities (n=0) | Fever (n=2), cough (n=2), dyspnea (n=1), asymptomatic (n=8)                                             | Antiviral (n=4), interferon (n=7), Chinese medicine (n=5)                                         | Recovered (n=11)<br>ICU admission (n=0) |
| Harman, K 2020    | UK     | HIC  | 5  | Patients admitted in hospital   | 7.1  | 2 | Travel history (NR)<br>Contact history (NR)<br>Comorbidities (n=5)    | Fever (n=3), asymptomatic (n=2)                                                                         | Antiviral (n=1), antibiotics (n=5), antimalarial (n=1)                                            | Recovered (n=4)<br>ICU admission (n=2)  |
| Blondiaux, E 2020 | France | HIC  | 4  | Patients admitted in hospital   | 9.0  | 1 | Travel history (NR)<br>Contact history (n=3)<br>Comorbidities (n=0)   | Fever (n=4), GI symptoms (n=4), rashes (n=4), conjunctivitis (n=3)                                      | Mechanical ventilation (n=1), systemic steroids (n=3), inotropes (n=3), aspirin (n=3), IVIG (N=4) | Recovered (n=4)<br>ICU admission (n=4)  |
| Pouletty, M 2020  | France | HIC  | 16 | Patients admitted in hospital   | 10.0 | 8 | Travel history (n=0)<br>Contact history (n=12)                        | Fever (n=16), cough (n=2), dyspnea (n=2), GI symptoms (n=13), neurological (n=9), Kawasaki signs (n=7), | Mechanical ventilation (n=2), systemic steroids (n=4), antimalarial (n=1), aspirin (n=3), IVIG    | Recovered (n=16)<br>ICU admission (n=6) |

|                   |        |      |      |                               |      |      |                                                                          |                                                                                                                                                                               |                                                                                        |                                                           |
|-------------------|--------|------|------|-------------------------------|------|------|--------------------------------------------------------------------------|-------------------------------------------------------------------------------------------------------------------------------------------------------------------------------|----------------------------------------------------------------------------------------|-----------------------------------------------------------|
|                   |        |      |      |                               |      |      | Comorbidities (n=6)                                                      | rashes (n=13), conjunctivitis (n=15)                                                                                                                                          | (N=15), inotropes (n=6), aspirin (n=15)                                                |                                                           |
| Whittaker, E 2020 | UK     | HIC  | 45   | Patients admitted in hospital | 10.0 | 19   | Travel history (NR)<br>Contact history (NR)<br>Comorbidities (n=7)       | Fever (n=45), dyspnea (n=9), GI symptoms (n=25), neurological (n=5), Kawasaki signs (n=25), rashes (n=21), conjunctivitis (n=20)                                              | Mechanical ventilation (n=20), systemic steroids (n=33), IVIG (N=33), inotropes (n=23) | Recovered (n=44)<br>ICU admission (n=20)<br>Death (n=1)   |
| Cheung, EW 2020   | USA    | HIC  | 17   | Patients admitted in hospital | 8.0  | 8    | Travel history (n=0)<br>Contact history (n=11)<br>Comorbidities (n=3)    | Fever (n=17), cough (n=7), dyspnea (n=7), neurological (n=8), Kawasaki signs (n=13), rashes (n=12), conjunctivitis (n=11)                                                     | Systemic steroids (n=12), IVIG (N=13), inotropes (n=10), aspirin (n=4)                 | Recovered (n=17)<br>ICU admission (n=15)                  |
| Lu, X 2020        | China  | LMIC | 171  | National surveillance         | 6.7  | 104  | Travel history (n=17)<br>Contact history (n=131)<br>Comorbidities (n=9)  | Fever (n=71), cough (n=83), pharyngeal erythema (n=79), fatigue (n=13), diarrhea (n=15), nausea or vomiting (n=11), nasal symptoms or sore throat (n=22), asymptomatic (n=27) | NR                                                                                     | Recovered (n=149)<br>ICU admission (n=3)<br>Death (n=1)   |
| CDC, COVID 2020   | USA    | HIC  | 2572 | National surveillance         | 9.8  | 1408 | Travel history (n=16)<br>Contact history (n=168)<br>Comorbidities (n=80) | Fever (n=163), cough (n=158), dyspnea (n=39), diarrhea (n=37), nausea or vomiting (n=31), abdominal pain (n=17), nasal symptoms or sore throat (n=71), neurological (n=81)    | NR                                                                                     | Recovered (n=2569)<br>ICU admission (n=15)<br>Death (n=3) |
| Gotzinger, F 2020 | Europe | HIC  | 582  | Multinational cohort study    | 5.6  | 311  | Travel history (n=0)<br>Contact history (n=348)<br>Comorbidities (n=145) | Fever (n=379), GI symptoms (n=128), neurological (n=70), asymptomatic (n=92)                                                                                                  | Antiviral (n=30), IVIG (n=7), systemic steroids (n=22), antimalarial (n=40)            | Recovered (n=460)<br>ICU admission (n=48)<br>Death (n=4)  |

|                         |       |      |     |                               |      |     |                                                                        |                                                                                                                   |                                                                                       |                                                          |
|-------------------------|-------|------|-----|-------------------------------|------|-----|------------------------------------------------------------------------|-------------------------------------------------------------------------------------------------------------------|---------------------------------------------------------------------------------------|----------------------------------------------------------|
| Dong, Y<br>2020         | China | LMIC | 728 | National surveillance study   | 9.8  | 418 | Travel history (NR)<br>Contact history (NR)<br>Comorbidities (NR)      | 315 mild illness, 300 moderate illness, 18 severe and 3 critically ill, 94 asymptomatic children                  | NR                                                                                    | Recovered (n=727)<br>ICU admission (n=21)<br>Death (n=1) |
| Abdel-Mannan, O<br>2020 | UK    | HIC  | 4   | Patients admitted in hospital | 11.8 | 2   | Travel history (NR)<br>Contact history (NR)<br>Comorbidities (NR)      | Fever (n=4), dyspnea (n=2), nausea or vomiting (n=4), abdominal pain (n=1), neurological (n=4), rashes (n=4)      | Mechanical ventilation (n=4), IVIG (n=3), systemic steroids (n=2)                     | Recovered (n=2)<br>ICU admission (n=4)                   |
| Guha, A<br>2020         | India | LMIC | 41  | National surveillance         | 1.9  | 24  | Travel history (n=0)<br>Contact history (n=26)<br>Comorbidities (n=25) | Fever (n=9), cough (n=5), dyspnea (n=13), diarrhea (n=3), Kawasaki signs (n=2), rashes (n=2), asymptomatic (n=11) | Mechanical ventilation (n=2)                                                          | Recovered (n=40)<br>ICU admission (n=6)<br>Death (n=1)   |
| Bhumbra, S<br>2020      | USA   | HIC  | 19  | Patients admitted in hospital | 6.7  | 14  | Travel history (NR)<br>Contact history (NR)<br>Comorbidities (n=8)     | Fever (n=12), cough (n=5), dyspnea (n=12), nausea or vomiting (n=2), sore throat (n=2),                           | Mechanical ventilation (n=4)                                                          | Recovered (n=12)<br>ICU admission (n=7)<br>Death (n=1)   |
| Bisogno, G<br>2020      | Italy | HIC  | 29  | Patients admitted in hospital | 7.5  | 13  | Travel history (NR)<br>Contact history (NR)<br>Comorbidities (n=29)    | Fever (n=8), fatigue (n=1), dyspnea (n=7), diarrhea (n=1), nausea or vomiting (n=1), asymptomatic (n=7)           | Mechanical ventilation (n=0), antiviral (n=3), antibiotics (n=13), antimalarial (n=9) | Recovered (n=27)<br>ICU admission (n=0)                  |
| Blumfield, E<br>2020    | USA   | HIC  | 19  | Patients admitted in hospital | 8.5  | 10  | Travel history (NR)<br>Contact history (NR)                            | Fever (n=17), cough (n=13), dyspnea (n=13), diarrhea (n=9), nausea or vomiting (n=9), abdominal pain (n=2),       | Mechanical ventilation (n=8)                                                          | Recovered (n=17)<br>ICU admission (n=14)<br>Death (n=2)  |

|                          |            |      |     |                                           |      |     |                                                                        |                                                                                                                                                                  |                                                                                                                                      |                                                           |
|--------------------------|------------|------|-----|-------------------------------------------|------|-----|------------------------------------------------------------------------|------------------------------------------------------------------------------------------------------------------------------------------------------------------|--------------------------------------------------------------------------------------------------------------------------------------|-----------------------------------------------------------|
|                          |            |      |     |                                           |      |     | Comorbidities (n=12)                                                   | neurological (n=5), nasal symptoms or sore throat (n=8)                                                                                                          |                                                                                                                                      |                                                           |
| Derespin a, KR 2020      | USA        | HIC  | 70  | Patients admitted in hospital             | 14.5 | 43  | Travel history (n=2)<br>Contact history (n=30)<br>Comorbidities (n=52) | Fever (n=51), cough (n=50), dyspnea (n=45), fatigue (n=13), diarrhea (n=18), nausea or vomiting (n=24), neurological (n=15), nasal symptoms or sore throat (n=9) | Mechanical ventilation (n=20), antiviral (n=13), antibiotics (n=23), systemic steroids (n=23), antimalarial (n=27), inotropes (n=14) | Recovered (n=55)<br>ICU admission (n=2)<br>Death (n=70)   |
| Feldstein , LR 2020      | USA        | HIC  | 186 | Patients admitted in hospital             | 8.1  | 115 | Travel history (NR)<br>Contact history (NR)<br>Comorbidities (n=51)    | Fever (n=186), GI symptoms (n=170), neurological (n=10), Kawasaki signs (n=186), rashes (n=110), conjunctivitis (n=103)                                          | Mechanical ventilation (n=37), IVIG (n=144), systemic steroids (n=91),                                                               | Recovered (n=130)<br>ICU admission (n=148)<br>Death (n=4) |
| George, S 2020           | Brunei-Dar | LMIC | 12  | National surveillance                     | 6.1  | 7   | Travel history (n=0)<br>Contact history (n=12)<br>Comorbidities (n=4)  | Fever (n=6), cough (n=6), asymptomatic (n=4)                                                                                                                     | Antibiotics (n=1)                                                                                                                    | Recovered (n=12)<br>ICU admission (n=0)                   |
| Gonzalez -Cortes, R 2020 | Spain      | HIC  | 50  | Patients admitted to intensive care units | 6.7  | 31  | Travel history (NR)<br>Contact history (NR)<br>Comorbidities (NR)      | Dyspnea (n=20), neurological (n=1), Kawasaki (n=27), rashes (n=27)                                                                                               | Mechanical ventilation (n=14), antiviral (n=26), antibiotics (n=43), IVIG (n=15), systemic steroids (n=32), antimalarial (n=29)      | Recovered (n=50)<br>ICU admission (n=14)                  |
| Kainth, MK 2020          | USA        | HIC  | 65  | Patients admitted in hospital             | 9.6  | 33  | Travel history (NR)<br>Contact history (n=33)<br>Comorbidities (n=30)  | Fever (n=57), cough (n=32), fatigue (n=26), dyspnea (n=34), GI symptoms (n=40), nasal symptoms or sore throat                                                    | Mechanical ventilation (n=5), antiviral (n=4), antibiotics (n=13), systemic steroids                                                 | Recovered (n=57)<br>ICU admission (n=22)<br>Death (n=1)   |

|                  |        |      |    |                               |     |    |                                                                       |                                                                                                                                                                                 |                                                                                                                            |                                                         |
|------------------|--------|------|----|-------------------------------|-----|----|-----------------------------------------------------------------------|---------------------------------------------------------------------------------------------------------------------------------------------------------------------------------|----------------------------------------------------------------------------------------------------------------------------|---------------------------------------------------------|
|                  |        |      |    |                               |     |    |                                                                       | (n=22), neurological (n=21), rashes (n=5)                                                                                                                                       | (n=7), antimalarial (n=13), inotropes (n=8)                                                                                |                                                         |
| Kaushik, S 2020  | USA    | HIC  | 33 | Patients admitted in hospital | 9.8 | 20 | Travel history (NR)<br>Contact history (n=13)<br>Comorbidities (n=16) | Fever (n=31), dyspnea (n=11), diarrhea (n=16), nausea or vomiting (n=23), abdominal pain (n=21), neurological (n=4), Kawasaki signs (n=33), rashes (n=7), conjunctivitis (n=12) | Mechanical ventilation (n=5), antiviral (n=7), antibiotics (n=32), systemic steroids (n=17), IVIG (n=18), inotropes (n=17) | Recovered (n=32)<br>ICU admission (n=33)<br>Death (n=1) |
| Kest, H 2020     | USA    | HIC  | 3  | Patients admitted in hospital | 8.3 | 1  | Travel history (n=0)<br>Contact history (n=1)<br>Comorbidities (n=0)  | Fever (n=3), fatigue (n=1), GI symptoms (n=3), neurological (n=2), Kawasaki signs (n=3), rashes (n=3), conjunctivitis (n=3)                                                     | Mechanical ventilation (n=2), antibiotics (n=2), IVIG (n=2), systemic steroids (n=3), antimalarial (n=1), inotropes (n=3)  | Recovered (n=3)<br>ICU admission (n=3)                  |
| Korkmaz, MF 2020 | Turkey | LMIC | 81 | Patients admitted in hospital | 9.2 | 48 | Travel history (NR)<br>Contact history (n=75)<br>Comorbidities (n=4)  | Fever (n=47), cough (n=42), fatigue (n=15), dyspnea (n=2), GI symptoms (n=3), nasal symptoms or sore throat (n=7), neurological (n=11), asymptomatic (n=17)                     | Antibiotics (n=42), systemic steroids (n=3)                                                                                | Recovered (n=81)<br>ICU admission (n=2)                 |
| Meslin, P 2020   | France | HIC  | 6  | Patients admitted in hospital | 0.1 | 3  | Travel history (NR)<br>Contact history (n=4)<br>Comorbidities (n=2)   | Fever (n=6), cough (n=1), fatigue (n=1), nausea or vomiting (n=1), nasal symptoms (n=2)                                                                                         | NR                                                                                                                         | Recovered (n=6)<br>ICU admission (n=0)                  |
| Moraleda, C 2020 | Spain  | HIC  | 31 | Patients admitted in hospital | 7.8 | 18 | Travel history (NR)<br>Contact history (n=16)                         | Fever (n=30), cough (n=11), fatigue (n=5), dyspnea (n=8), GI symptoms (n=27), sore throat or nasal symptoms (n=8),                                                              | Mechanical ventilation (n=6), antiviral (n=9), antibiotics (n=28), systemic steroids (n=21), IVIG (n=20)                   | Recovered (n=29)<br>ICU admission (n=20)<br>Death (n=1) |

|                    |        |      |     |                                                     |      |     |                                                                         |                                                                                                                                                                       |                                                                         |                                          |
|--------------------|--------|------|-----|-----------------------------------------------------|------|-----|-------------------------------------------------------------------------|-----------------------------------------------------------------------------------------------------------------------------------------------------------------------|-------------------------------------------------------------------------|------------------------------------------|
|                    |        |      |     |                                                     |      |     | Comorbidities (n=10)                                                    | neurological (n=10), Kawasaki signs (n=13), rashes (n=23)                                                                                                             |                                                                         |                                          |
| Foong, Ng 2020     | UK     | HIC  | 3   | Patients admitted in hospital                       | 15.3 | 2   | Travel history (n=0)<br>Contact history (n=0)<br>Comorbidities (n=1)    | GI symptoms (n=3), Kawasaki signs (n=3), rashes (n=3), conjunctivitis (n=3)                                                                                           | Antibiotics (n=3), systemic steroids (n=1), IVIG (n=1), inotropes (n=2) | Recovered (n=3)<br>ICU admission (n=3)   |
| Pacquett e, D 2020 | Canada | HIC  | 938 | National surveillance                               | NR   | 463 | Travel history (n=106)<br>Contact history (n=305)<br>Comorbidities (NR) | NR                                                                                                                                                                    | NR                                                                      | NR                                       |
| Parri , N 2020     | Italy  | HIC  | 130 | Data collected through large collaborative networks | 5.8  | 73  | Travel history (n=0)<br>Contact history (n=70)<br>Comorbidities (N=34)  | Fever (n=67), cough (n=54), dyspnea (n=17), diarrhea (n=10), sore throat or nasal symptoms (n=25), nausea or vomiting (n=15), neurological (n=3), asymptomatic (n=17) | Mechanical ventilation (n=2)                                            | Recovered (n=130)<br>ICU admission (n=9) |
| Perez, A 2020      | USA    | HIC  | 2   | Patients admitted in hospital                       | 16.5 | 1   | Travel history (n=0)<br>Contact history (n=0)<br>Comorbidities (N=0)    | Fever (n=1), fatigue (n=1), diarrhea (n=1), nausea or vomiting (n=1), abdominal pain (n=1)                                                                            | NR                                                                      | Recovered (n=2)<br>ICU admission (n=0)   |
| Sarangi, B 2020    | India  | LMIC | 50  | Patients presenting to in hospital                  | NR   | 28  | Travel history (n=1)<br>Contact history (n=45)<br>Comorbidities (N=2)   | Fever (n=17), cough (n=8), fatigue (n=4), diarrhea (n=2), sore throat or nasal symptoms (n=7), neurological (n=2), rashes (n=1),                                      | NR                                                                      | Recovered (n=50)<br>ICU admission (n=0)  |

|                        |                            |      |     |                                  |      |     |                                                                         |                                                                                                                                                                                                                                                               |                                                                                                                  |                                                           |
|------------------------|----------------------------|------|-----|----------------------------------|------|-----|-------------------------------------------------------------------------|---------------------------------------------------------------------------------------------------------------------------------------------------------------------------------------------------------------------------------------------------------------|------------------------------------------------------------------------------------------------------------------|-----------------------------------------------------------|
|                        |                            |      |     |                                  |      |     |                                                                         | asymptomatic (n=29), conjunctivitis (n=1)                                                                                                                                                                                                                     |                                                                                                                  |                                                           |
| Sadiq, M 2020          | Pakistan                   | LMIC | 8   | Patients admitted in hospital    | 9.5  | 7   | Travel history (n=0)<br>Contact history (n=8)<br>Comorbidities (N=0)    | Fever (n=8), fatigue (n=6), GI symptoms (n=6), neurological (n=3), Kawasaki signs (n=8), rashes (n=5), conjunctivitis (n=7)                                                                                                                                   | Mechanical ventilation (n=1), systemic steroids (n=3), IVIG (n=6),                                               | Recovered (n=5)<br>ICU admission (n=2)<br>Death (n=1)     |
| Swann, OV 2020         | UK                         | HIC  | 651 | Patients admitted in hospitals   | 5.8  | 367 | Travel history (NR)<br>Contact history (NR)<br>Comorbidities (n=276)    | Fever (n=429), cough (n=231), fatigue (n=141), dyspnea (n=172), diarrhea (n=98), nausea or vomiting (n=179), abdominal pain (n=107), sore throat or nasal symptoms (n=132), neurological (n=148), kawasaki signs (n=52), rashes (n=87), conjunctivitis (n=26) | Mechanical ventilation (n=58), antiviral (n=38), antibiotics (n=415), systemic steroids (n=77), inotropes (n=47) | Recovered (n=557)<br>ICU admission (n=116)<br>Death (n=6) |
| Antunez-Montez, O 2020 | 5 Latin american Countries | LMIC | 409 | Patients presenting to hospitals | 5.05 | 222 | Travel history (n=0)<br>Contact history (n=232)<br>Comorbidities (N=83) | Fever (n=238), dyspnea (n=102), GI symptoms (n=101), sore throat or nasal symptoms (n=244), neurological (n=48), kawasaki signs (n=95), rashes (n=95), conjunctivitis (n=95), asymptomatic (n=49)                                                             | Mechanical ventilation (n=29), antiviral (n=14), IVIG (n=40), systemic steroids (n=63), antimalarial (n=10)      | Recovered (n=392)<br>ICU admission (n=52)<br>Death (n=17) |
| Capone, C 2020         | USA                        | HIC  | 33  | Patients admitted in hospital    | 8.8  | 20  | Travel history (NR)<br>Contact history (NR)<br>Comorbidities (N=7)      | Fever (n=33), cough (n=17), dyspnea (n=17), diarrhea (n=32), nausea or vomiting (n=32), abdominal pain (n=32), neurological (n=19), kawasaki signs (n=21),                                                                                                    | Mechanical ventilation (n=6), IVIG (n=33), systemic steroids (n=23), aspirin (n=29)                              | Recovered (n=33)<br>ICU admission (n=52)<br>Death (n=17)  |

|                    |         |      |     |                                           |          |     |                                                                        |                                                                                                                                                                                                            |                                                                                                                                             |                                                         |
|--------------------|---------|------|-----|-------------------------------------------|----------|-----|------------------------------------------------------------------------|------------------------------------------------------------------------------------------------------------------------------------------------------------------------------------------------------------|---------------------------------------------------------------------------------------------------------------------------------------------|---------------------------------------------------------|
|                    |         |      |     |                                           |          |     |                                                                        | rashes (n=21), conjunctivitis (n=21)                                                                                                                                                                       |                                                                                                                                             |                                                         |
| Cura Yayla, B 2020 | Turkey  | LMIC | 220 | Patients admitted in hospitals            | 9.3      | 106 | Travel history (NR)<br>Contact history (n=217)<br>Comorbidities (N=21) | Fever (n=89), cough (n=79), fatigue (n=36), dyspnea (n=9), diarrhea (n=17), nausea or vomiting (n=9), sore throat or nasal symptoms (n=37), neurological (n=20), conjunctivitis (n=3), asymptomatic (n=55) | Mechanical ventilation (n=3), antiviral (n=6), antibiotics (n=40), antimalarial (n=1)                                                       | Recovered (n=209)<br>ICU admission (n=3)<br>Death (n=2) |
| Davies, P 2020     | UK      | HIC  | 78  | Patients admitted to intensive care units | 11.0     | 52  | Travel history (NR)<br>Contact history (NR)<br>Comorbidities (N=17)    | Fever (n=78), diarrhea (n=50), nausea or vomiting (n=49), abdominal pain (n=48), kawasaki signs (n=68), rashes (n=35), conjunctivitis (n=23)                                                               | Mechanical ventilation (n=36), antiviral (n=1), antibiotics (n=78), systemic steroids (n=57), IVIG (n=59), inotropes (n=65), aspirin (n=45) | Recovered (n=76)<br>ICU admission (n=78)<br>Death (n=2) |
| de Farias, E 2020  | Brazil  | LMIC | 11  | Patients admitted in hospital             | 5.4      | 9   | Travel history (NR)<br>Contact history (NR)<br>Comorbidities (N=8)     | Fever (n=11), kawasaki signs (n=5), rashes (n=5), conjunctivitis (n=5)                                                                                                                                     | Mechanical ventilation (n=7), inotropes (n=7)                                                                                               | Recovered (n=9)<br>ICU admission (n=11)<br>Death (n=2)  |
| Dima, M 2020       | Romania | HIC  | 3   | Patients admitted in hospital             | Newborns | 2   | Travel history (n=0)<br>Contact history (n=3)<br>Comorbidities (N=1)   | Fever (n=3), cough (n=1), fatigue (n=3), dyspnea (n=3)                                                                                                                                                     | antibiotics (n=1), IVIG (n=1), inotropes (n=47)                                                                                             | Recovered (n=3)<br>ICU admission (n=0)<br>Death (n=0)   |
| Han, M 2020        | Korea   | HIC  | 91  | Patients admitted in 20 hospitals         | 10.0     | 53  | Travel history (n=15)<br>Contact history (n=72)                        | Fever (n=27), cough (n=37), fatigue (n=12), dyspnea (n=5), diarrhea (n=11), nausea or vomiting (n=6),                                                                                                      | antiviral (n=13), antimalarial (n=2)                                                                                                        | Recovered (n=91)<br>ICU admission (n=0)<br>Death (n=0)  |



|                           |           |      |    |                                 |       |    |                                                                        |                                                                                                                                                                                                      |                                                           |                                                        |
|---------------------------|-----------|------|----|---------------------------------|-------|----|------------------------------------------------------------------------|------------------------------------------------------------------------------------------------------------------------------------------------------------------------------------------------------|-----------------------------------------------------------|--------------------------------------------------------|
|                           |           |      |    |                                 |       |    | Comorbidities (N=6)                                                    | abdominal pain (n=6), sore throat or nasal symptoms (n=8), neurological (n=12), asymptomatic (n=20)                                                                                                  |                                                           |                                                        |
| Ibrahim, L 2020           | Australia | HIC  | 4  | Patients presenting to hospital | 13.1  | 1  | Travel history (n=3)<br>Contact history (n=4)<br>Comorbidities (N=1)   | Fever (n=1), cough (n=2), fatigue (n=4), diarrhea (n=1), sore throat or nasal symptoms (n=2), neurological (n=3)                                                                                     | Only supportive care                                      | Recovered (n=4)<br>ICU admission (n=0)<br>Death (n=0)  |
| Kilani, M 2020            | Jordan    | LMIC | 61 | Patients admitted in hospital   | 6.9   |    | Travel history (n=0)<br>Contact history (NR)<br>Comorbidities (N=2)    | Fever (n=11), cough (n=7), fatigue (n=12), diarrhea (n=10), sore throat or nasal symptoms (n=21), neurological (n=12), rashes (n=5), conjunctivitis (n=2), asymptomatic (n=27)                       | antimalarial (n=6)                                        | Recovered (n=61)<br>ICU admission (n=0)<br>Death (n=0) |
| Okarska-Napierala, P 2020 | Poland    | HIC  | 9  | Nationwide survey               | 10.35 | 4  | Travel history (n=0)<br>Contact history (n=2)<br>Comorbidities (N=2)   | Fever (n=9), cough (n=2), fatigue (n=2), dyspnea (n=2), diarrhea (n=5), nausea or vomiting (n=5), abdominal pain (n=5), neurological (n=5), kawasaki signs (n=9), rashes (n=6), conjunctivitis (n=4) | IVIg (n=7), systemic steroids (n=7), aspirin (n=6)        | Recovered (n=4)<br>ICU admission (n=1)<br>Death (n=0)  |
| Mahmoudi, S 2020          | Iran      | LMIC | 35 | Patients admitted in hospital   | 7.5   | 22 | Travel history (n=0)<br>Contact history (n=29)<br>Comorbidities (N=18) | Fever (n=27), cough (n=28), fatigue (n=5), dyspnea (n=10), diarrhea (n=9), nausea or vomiting (n=10), abdominal pain (n=4), sore throat or nasal symptoms (n=3), neurological (n=7)                  | antiviral (n=30), antibiotics (n=35), antimalarial (n=22) | Recovered (n=31)<br>ICU admission (n=7)<br>Death (n=4) |

|                 |            |      |    |                                  |       |    |                                                                       |                                                                                                                                                                                                                                 |                                                                                                                           |                                                         |
|-----------------|------------|------|----|----------------------------------|-------|----|-----------------------------------------------------------------------|---------------------------------------------------------------------------------------------------------------------------------------------------------------------------------------------------------------------------------|---------------------------------------------------------------------------------------------------------------------------|---------------------------------------------------------|
| Mamishi, S 2020 | Iran       | LMIC | 45 | Patients admitted in 3 hospitals | 8.0   | 24 | Travel history (n=0)<br>Contact history (n=14)<br>Comorbidities (N=6) | Fever (n=41), cough (n=16), fatigue (n=11), dyspnea (n=10), diarrhea (n=16), nausea or vomiting (n=23), abdominal pain (n=26), sore throat or nasal symptoms (n=7), kawasaki signs (n=31), rashes (n=24), conjunctivitis (n=23) | IVIg (n=18), systemic steroids (n=27),                                                                                    | Recovered (n=40)<br>ICU admission (n=5)<br>Death (n=5)  |
| Mithal, L 2020  | USA        | HIC  | 18 | Patients presenting to hospital  | 0.134 | 7  | Travel history (n=0)<br>Contact history (n=14)<br>Comorbidities (N=0) | Fever (n=14), cough (n=8), fatigue (n=5), dyspnea (n=1), diarrhea (n=4), nausea or vomiting (n=4), sore throat or nasal symptoms (n=5), rashes (n=1), conjunctivitis (n=2), asymptomatic (n=1)                                  | antibiotics (n=6)                                                                                                         | Recovered (n=18)<br>ICU admission (n=0)<br>Death (n=0)  |
| Newman, A 2020  | USA        | HIC  | 4  | Patients admitted in hospital    | 10.9  | 4  | Travel history (n=0)<br>Contact history (n=0)<br>Comorbidities (N=4)  | Fever (n=3), cough (n=4), fatigue (n=2), dyspnea (n=1), nausea or vomiting (n=1), abdominal pain (n=1), sore throat or nasal symptoms (n=1)                                                                                     | Mechanical ventilation (n=1), antiviral (n=1), antibiotics (n=1), antimalarial (n=1)                                      | Recovered (n=4)<br>ICU admission (n=1)<br>Death (n=0)   |
| Torres, J 2020  | Chile      | HIC  | 27 | Patients admitted in hospital    | 6.5   | 14 | Travel history (n=0)<br>Contact history (n=9)<br>Comorbidities (N=7)  | Fever (n=27), cough (n=7), diarrhea (n=17), nausea or vomiting (n=13), abdominal pain (n=17), kawasaki signs (n=18), rashes (n=14), conjunctivitis (n=13)                                                                       | Mechanical ventilation (n=12), antibiotics (n=24), IVIg (n=19), systemic steroids (n=17) inotropes (n=12), aspirin (n=17) | Recovered (n=27)<br>ICU admission (n=16)<br>Death (n=0) |
| Saha, S 2020    | Bangladesh | LMIC | 26 |                                  | 0.02  | 16 | Travel history (n=0)                                                  | Fever (n=14)                                                                                                                                                                                                                    |                                                                                                                           | Recovered (n=12)                                        |

|                  |       |      |    | Patients admitted in hospital       |          |    | Contact history (n=8)<br>Comorbidities (N=17)                          |                                                                                                                                                                                                   | Mechanical ventilation (n=25)                                                                                           | ICU admission (n=0)<br>Death (n=4)                      |
|------------------|-------|------|----|-------------------------------------|----------|----|------------------------------------------------------------------------|---------------------------------------------------------------------------------------------------------------------------------------------------------------------------------------------------|-------------------------------------------------------------------------------------------------------------------------|---------------------------------------------------------|
| Gale, C 2020     | UK    | HIC  | 66 | Population based surveillance study | Newborns | 27 | Travel history (n=0)<br>Contact history (n=34)<br>Comorbidities (N=18) | Fever (n=35), cough (n=11), fatigue (n=33), dyspnea (n=24), diarrhea (n=4), nausea or vomiting (n=33), sore throat or nasal symptoms (n=26), neurological (n=5), rashes (n=2), asymptomatic (n=7) | Mechanical ventilation (n=3), antiviral (n=2), antibiotics (n=46), IVIG (n=1), systemic steroids (n=2), inotropes (n=1) | Recovered (n=58)<br>ICU admission (n=4)<br>Death (n=1)  |
| Schwartz, D 2020 | Iran  | LMIC | 17 | Patients admitted in hospital       | Newborns | 10 | Travel history (n=0)<br>Contact history (n=11)<br>Comorbidities (NR)   | Fever (n=4), cough (n=3), fatigue (n=17), dyspnea (n=12), diarrhea (n=1), abdominal pain (n=1), asymptomatic (n=2)                                                                                | Mechanical ventilation (n=4), antibiotics (n=5), antimalarial (n=1), inotropes (n=1)                                    | Recovered (n=7)<br>ICU admission (n=4)<br>Death (n=2)   |
| Schwartz, S 2020 | USA   | HIC  | 4  | Patients admitted in hospital       | 12.0     | 2  | Travel history (n=0)<br>Contact history (n=0)<br>Comorbidities (N=3)   | Fever (n=4), cough (n=3), fatigue (n=3), dyspnea (n=3), diarrhea (n=2), nausea or vomiting (n=3), abdominal pain (n=2), sore throat or nasal symptoms (n=2), rashes (n=1)                         | Mechanical ventilation (n=2), antiviral (n=2), systemic steroids (n=1), inotropes (n=1)                                 | Recovered (n=4)<br>ICU admission (n=4)<br>Death (n=0)   |
| Jain, S 2020     | India | LMIC | 23 | Patients admitted in hospital       | 7.3      | 11 | Travel history (n=0)<br>Contact history (n=8)<br>Comorbidities (NR)    | Fever (n=23), cough (n=0), fatigue (n=3), dyspnea (n=11), diarrhea (n=15), nausea or vomiting (n=15), abdominal pain (n=12), sore throat or nasal symptoms (n=0), kawasaki signs (n=23),          | Mechanical ventilation (n=9), IVIG (n=15), systemic steroids (n=22) inotropes (n=15)                                    | Recovered (n=22)<br>ICU admission (n=15)<br>Death (n=1) |

|                      |              |      |     |                                                             |      |    |                                                                       |                                                                                                                                                                                                                                                  |                                                                                                     |                                                          |
|----------------------|--------------|------|-----|-------------------------------------------------------------|------|----|-----------------------------------------------------------------------|--------------------------------------------------------------------------------------------------------------------------------------------------------------------------------------------------------------------------------------------------|-----------------------------------------------------------------------------------------------------|----------------------------------------------------------|
|                      |              |      |     |                                                             |      |    |                                                                       | rashes (n=14), conjunctivitis (n=11)                                                                                                                                                                                                             |                                                                                                     |                                                          |
| Webb, K 2020         | South Africa | LMIC | 23  | Patients admitted in hospital                               | 6.6  | 6  | Travel history (n=0)<br>Contact history (n=3)<br>Comorbidities (N=8)  | Fever (n=23), cough (n=0), fatigue (n=8), dyspnea (n=10), diarrhea (n=13), nausea or vomiting (n=0), abdominal pain (n=15), sore throat or nasal symptoms (n=0), neurological (n=5), kawasaki signs (n=16), rashes (n=20), conjunctivitis (n=15) | Mechanical ventilation (n=6), IVIG (n=23), systemic steroids (n=15) inotropes (n=9), aspirin (n=17) | Recovered (n=15)<br>ICU admission (n=12)<br>Death (n=0)  |
| van der Zalm, M 2020 | South Africa | LMIC | 159 | Patients presenting to hospital                             | 4.5  | 88 | Travel history (NR)<br>Contact history (NR)<br>Comorbidities (N=33)   | Fever (n=50), cough (n=72), fatigue (n=0), dyspnea (n=27), diarrhea (n=22), nausea or vomiting (n=18), abdominal pain (n=0), sore throat or nasal symptoms (n=18), neurological (n=20), kawasaki signs (n=3), rashes (n=6)                       | Mechanical ventilation (n=4)                                                                        | Recovered (n=149)<br>ICU admission (n=11)<br>Death (n=1) |
| Sethuraman, U 2020   | USA          | HIC  | 34  | Patients presenting to emergency department of the hospital | 6.0  | 16 | Travel history (n=0)<br>Contact history (n=6)<br>Comorbidities (N=11) | Fever (n=30), cough (n=0), fatigue (n=0), dyspnea (n=1), diarrhea (n=13), nausea or vomiting (n=14), abdominal pain (n=20), sore throat or nasal symptoms (n=9), rashes (n=19), conjunctivitis (n=9)                                             | Mechanical ventilation (n=8), IVIG (n=24), inotropes (n=10), aspirin (n=24)                         | Recovered (n=34)<br>ICU admission (n=24)<br>Death (n=0)  |
| Onal, P 2020         | Turkey       |      | 37  |                                                             | 10.0 | 20 | Travel history (n=0)                                                  | Fever (n=26), cough (n=28), fatigue (n=18), dyspnea (n=13), diarrhea                                                                                                                                                                             | Mechanical ventilation (n=1), antivirals (n=22)                                                     | Recovered (n=37)                                         |

|                          |        |      |     |                                 |     |    |                                                                        |                                                                                                                                                                                                                                |                                                                                                                              |                                                          |
|--------------------------|--------|------|-----|---------------------------------|-----|----|------------------------------------------------------------------------|--------------------------------------------------------------------------------------------------------------------------------------------------------------------------------------------------------------------------------|------------------------------------------------------------------------------------------------------------------------------|----------------------------------------------------------|
|                          |        | LMIC |     | Patients presenting to hospital |     |    | Contact history (n=29)<br>Comorbidities (N=10)                         | (n=4), nausea or vomiting (n=8), abdominal pain (n=12), sore throat or nasal symptoms (n=12), neurological (n=11), asymptomatic (n=2)                                                                                          | antibiotics (n=24), IVIG (n=19), antimalarials (n=14)                                                                        | ICU admission (n=10)<br>Death (n=0)                      |
| Rabha, A 2020            | Brazil | LMIC | 115 | Patients admitted in hospital   | 3.3 | 66 | Travel history (n=0)<br>Contact history (n=86)<br>Comorbidities (N=30) | Fever (n=79), cough (n=59), fatigue (n=31), dyspnea (n=15), diarrhea (n=15), nausea or vomiting (n=20), abdominal pain (n=10), sore throat or nasal symptoms (n=17), rashes (n=5), neurological (n=23), asymptomatic (n=3)     | antibiotics (n=24)                                                                                                           | Recovered (n=115)<br>ICU admission (n=12)<br>Death (n=0) |
| Shahbaz nejad, L 2020    | Iran   | LMIC | 10  | Patients admitted in hospital   | 5.4 | 6  | Travel history (n=0)<br>Contact history (n=10)<br>Comorbidities (N=0)  | Fever (n=10), fatigue (n=2), dyspnea (n=2), diarrhea (n=7), nausea or vomiting (n=6), abdominal pain (n=9), sore throat or nasal symptoms (n=4), rashes (n=8), kawasaki signs (n=10), neurological (n=1), conjunctivitis (n=3) | Antivirals (n=1), antibiotics (n=10), IVIG (n=6), systemic steroids (n=2), antimalarial (n=8) inotropes (n=2), aspirin (n=3) | Recovered (n=9)<br>ICU admission (n=3)<br>Death (n=1)    |
| Storch-de-Garcia, P 2020 | Spain  | HIC  | 39  | Patients admitted in hospital   | 8.5 | 23 | Travel history (n=0)<br>Contact history (n=27)<br>Comorbidities (N=5)  | Fever (n=32), cough (n=20), fatigue (n=13), dyspnea (n=9), diarrhea (n=14), nausea or vomiting (n=15), abdominal pain (n=12), sore throat or nasal symptoms (n=18), rashes (n=10), kawasaki signs                              | Antivirals (n=13), antibiotics (n=25), IVIG (n=4), systemic steroids (n=15), antimalarial (n=15), aspirin (n=12)             | Recovered (n=39)<br>ICU admission (n=14)<br>Death (n=0)  |

|                       |        |      |    |                                     |          |    |                                                                        |                                                                                                                                                                                                                                                      |                                                                                                                                                    |                                                         |
|-----------------------|--------|------|----|-------------------------------------|----------|----|------------------------------------------------------------------------|------------------------------------------------------------------------------------------------------------------------------------------------------------------------------------------------------------------------------------------------------|----------------------------------------------------------------------------------------------------------------------------------------------------|---------------------------------------------------------|
|                       |        |      |    |                                     |          |    |                                                                        | (n=11), neurological (n=7), asymptomatic (n=7)                                                                                                                                                                                                       |                                                                                                                                                    |                                                         |
| García-Salido, A 2020 | Spain  | HIC  | 74 | 47 pediatric intensive care centres | 7.7      | 46 | Travel history (n=0)<br>Contact history (n=13)<br>Comorbidities (N=22) | Fever (n=61), cough (n=26), fatigue (n=48), dyspnea (n=23), diarrhea (n=33), nausea or vomiting (n=38), abdominal pain (n=33), sore throat or nasal symptoms (n=11), kawasaki signs (n=45), neurological (n=22)                                      | Mechanical ventilation (n=18), antivirals (n=35), antibiotics (n=65), IVIG (n=25), systemic steroids (n=49), antimalarial (n=43), inotropes (n=37) | Recovered (n=65)<br>ICU admission (n=74)<br>Death (n=3) |
| Lima-setta, F 2020    | Brazil | LMIC | 56 | 17 pediatric intensive care centres | 6.3      | 39 | Travel history (n=0)<br>Contact history (n=27)<br>Comorbidities (N=11) | Fever (n=56), cough (n=16), fatigue (n=28), dyspnea (n=9), diarrhea (n=30), nausea or vomiting (n=21), abdominal pain (n=30), sore throat or nasal symptoms (n=17), rashes (n=38), kawasaki signs (n=26), neurological (n=27), conjunctivitis (n=26) | Mechanical ventilation (n=6), antivirals (n=5), antibiotics (n=33), IVIG (n=50), systemic steroids (n=31), aspirin (n=25)                          | Recovered (n=53)<br>ICU admission (n=56)<br>Death (n=1) |
| Zachariah, P 2020     | USA    | HIC  | 50 | Patients admitted in hospital       | 11.5     | 27 | Travel history (n=0)<br>Contact history (n=9)<br>Comorbidities (N=33)  | Fever (n=40), cough (n=23), dyspnea (n=17), diarrhea (n=7), nausea or vomiting (n=7), abdominal pain (n=7), sore throat or nasal symptoms (n=6), neurological (n=3)                                                                                  | Mechanical ventilation (n=9), antivirals (n=4), IVIG (n=1), antimalarial (n=15)                                                                    | Recovered (n=47)<br>ICU admission (n=9)<br>Death (n=1)  |
| Kalamdani, P 2020     | India  | LMIC | 12 | Patients admitted in hospital       | Newborns | 8  | Travel history (n=0)<br>Contact history (n=12)                         | Fever (n=3), fatigue (n=2)                                                                                                                                                                                                                           | NR                                                                                                                                                 | Recovered (n=12)<br>ICU admission (n=0)<br>Death (n=0)  |

|                      |          |      |    |                                                                                |          |    | Comorbidities (NR)                                                     |                                                                                                                                                                                                                  |                                                                                                            |                                                         |
|----------------------|----------|------|----|--------------------------------------------------------------------------------|----------|----|------------------------------------------------------------------------|------------------------------------------------------------------------------------------------------------------------------------------------------------------------------------------------------------------|------------------------------------------------------------------------------------------------------------|---------------------------------------------------------|
| Colomer, B 2020      | Spain    | HIC  | 40 | Cases from a National Registry supported by the Spanish Society of Neonatology | Newborns | 25 | Travel history (n=0)<br>Contact history (n=36)<br>Comorbidities (N=15) | Fever (n=18), cough (n=9), fatigue (n=4), dyspnea (n=7), diarrhea (n=2), nausea or vomiting (n=4), sore throat or nasal symptoms (n=5), rashes (n=1), asymptomatic (n=10)                                        | Antivirals (n=1), antibiotics (n=8), IVIG (n=19), antimalarial (n=5)                                       | Recovered (n=40)<br>ICU admission (n=8)<br>Death (n=0)  |
| Dhanalakshmi, K 2020 | India    | LMIC | 19 | Patients admitted in hospital                                                  | 7.2      | 8  | Travel history (n=0)<br>Contact history (n=0)<br>Comorbidities (N=1)   | Fever (n=19), dyspnea (n=8), diarrhea (n=3), nausea or vomiting (n=6), abdominal pain (n=8), sore throat or nasal symptoms (n=9), rashes (n=12), neurological (n=6), kawasaki signs (n=7), conjunctivitis (n=9)  | Antibiotics (n=19), IVIG (n=15), systemic steroids (n=11)<br>inotropes (n=6), aspirin (n=16)               | Recovered (n=19)<br>ICU admission (n=12)<br>Death (n=0) |
| Falah, N 2020        | Pakistan | LMIC | 10 | Patients admitted in 2 hospitals                                               | 6.0      | 8  | Travel history (n=0)<br>Contact history (n=2)<br>Comorbidities (N=0)   | Fever (n=10), cough (n=2), fatigue (n=4), dyspnea (n=2), diarrhea (n=3), abdominal pain (n=5), sore throat or nasal symptoms (n=6), rashes (n=8), neurological (n=6), kawasaki signs (n=5), conjunctivitis (n=9) | Antivirals (n=1), antibiotics (n=6), IVIG (n=9), systemic steroids (n=3)<br>inotropes (n=4), aspirin (n=7) | Recovered (n=10)<br>ICU admission (n=7)<br>Death (n=0)  |
| Zheng, G 2020        | China    | LMIC | 52 | Patients admitted in 11 hospitals                                              | 8.5      | 28 | Travel history (n=52)<br>Contact history (n=42)<br>Comorbidities (N=0) | Fever (n=21), cough (n=25), fatigue (n=5), diarrhea (n=1), nausea or vomiting (n=1), abdominal pain (n=1), sore throat or nasal                                                                                  | Antivirals (n=43), antibiotics (n=25)                                                                      | Recovered (n=52)<br>ICU admission (n=0)<br>Death (n=0)  |

|                        |              |      |     |                                                                                |     |     |                                                                          | symptoms (n=3), asymptomatic (n=13)                                                                                                                                                       |                                                                                                                                                                   |                                                         |
|------------------------|--------------|------|-----|--------------------------------------------------------------------------------|-----|-----|--------------------------------------------------------------------------|-------------------------------------------------------------------------------------------------------------------------------------------------------------------------------------------|-------------------------------------------------------------------------------------------------------------------------------------------------------------------|---------------------------------------------------------|
| Almoosa, Z 2020        | Saudi Arabia | HIC  | 10  | Patients admitted in 2 hospitals                                               | 7.6 | 5   | Travel history (n=0)<br>Contact history (n=6)<br>Comorbidities (N=5)     | Fever (n=10), fatigue (n=5), dyspnea (n=3), diarrhea (n=7), nausea or vomiting (n=9), abdominal pain (n=9), Kawasaki signs (n=10), rashes (n=10), conjunctivitis (n=9)                    | Mechanical ventilation (n=2), antivirals (n=7), antibiotics (n=10), IVIG (n=10), antimalarials (n=10), systemic steroids (n=17)<br>inotropes (n=5), aspirin (n=4) | Recovered (n=8)<br>ICU admission (n=8)<br>Death (n=2)   |
| Alsharrah, D 2020      | Kuwait       | HIC  | 134 | Patients admitted in hospital                                                  | 8.7 | 74  | Travel history (n=19)<br>Contact history (n=110)<br>Comorbidities (N=15) | Fever (n=75), cough (n=100), asymptomatic (n=91)                                                                                                                                          | Antibiotics (n=11)                                                                                                                                                | Recovered (n=133)<br>ICU admission (n=0)<br>Death (n=0) |
| Prata-Barbosa, A 2020  | Brazil       | LMIC | 79  | 19 pediatric intensive care centres                                            | 4.8 | 43  | Travel history (NR)<br>Contact history (NR)<br>Comorbidities (N=32)      | Fever (n=59), cough (n=40), fatigue (n=35), dyspnea (n=23), diarrhea (n=16), nausea or vomiting (n=16), abdominal pain (n=16), sore throat or nasal symptoms (n=17), kawasaki signs (n=5) | Mechanical ventilation (n=14), antivirals (n=34), antibiotics (n=60), systemic steroids (n=18)<br>inotropes (n=12), aspirin (n=17)                                | Recovered (n=71)<br>ICU admission (n=79)<br>Death (n=2) |
| Bayesheva, D 2020      | Kazakhstan   | LMIC | 650 | Data was reported from the official medical electronic database of the Country | 7.1 | 366 | Travel history (NR)<br>Contact history (NR)<br>Comorbidities (N=76)      | Fever (n=59), cough (n=96), fatigue (n=7), dyspnea (n=12), diarrhea (n=13), asymptomatic (n=315), sore throat or nasal symptoms (n=119), rashes (n=1)                                     | Mechanical ventilation (n=3)                                                                                                                                      | Recovered (n=650)<br>ICU admission (n=6)<br>Death (n=0) |
| Bustos-Cordova, E 2020 | Mexico       |      | 50  |                                                                                | 5.9 | 35  | Travel history (NR)                                                      | Fever (n=35), cough (n=22), fatigue (n=21), dyspnea (n=10), diarrhea                                                                                                                      |                                                                                                                                                                   | Recovered (n=50)                                        |



|                 |      |      |    |                                                                   |      |    |                                                                        |                                                                                                                                                                                     |                                                                                                                                            |                                                         |
|-----------------|------|------|----|-------------------------------------------------------------------|------|----|------------------------------------------------------------------------|-------------------------------------------------------------------------------------------------------------------------------------------------------------------------------------|--------------------------------------------------------------------------------------------------------------------------------------------|---------------------------------------------------------|
|                 |      | LMIC |    | Patients presenting to tertiary care centre outpatient department |      |    | Contact history (NR)<br>Comorbidities (N=26)                           | (n=11), nausea or vomiting (n=11), abdominal pain (n=11), sore throat or nasal symptoms (n=25), rashes (n=4), kawasaki signs (n=1), conjunctivitis (n=11)                           | Mechanical ventilation (n=2), antibiotics (n=15)                                                                                           | ICU admission (n=2)<br>Death (n=1)                      |
| Bhavsar, M 2020 | USA  | HIC  | 81 | Patients admitted in 12 hospitals in the city                     | 14.7 | 40 | Travel history (NR)<br>Contact history (NR)<br>Comorbidities (N=21)    | Fever (n=63), cough (n=38), diarrhea (n=26), nausea or vomiting (n=26), abdominal pain (n=26), neurological (n=7), rashes (n=8), conjunctivitis (n=7)                               | Mechanical ventilation (n=3), antivirals (n=6), IVIG (n=1), systemic steroids (n=15), antimalarials (n=10), inotropes (n=9), aspirin (n=1) | Recovered (n=71)<br>ICU admission (n=28)<br>Death (n=1) |
| Montoya, J 2020 | Peru | LMIC | 69 | Cancer patients admitted to tertiary care centres                 | 6.0  | 44 | Travel history (n=0)<br>Contact history (n=20)<br>Comorbidities (N=69) | Fever (n=12), cough (n=12), dyspnea (n=11), diarrhea (n=3), nausea or vomiting (n=3), abdominal pain (n=2), sore throat or nasal symptoms (n=11), rashes (n=1), asymptomatic (n=37) | Antibiotics (n=9), interferon (n=9), systemic steroids (n=9)                                                                               | Recovered (n=56)<br>ICU admission (n=3)<br>Death (n=7)  |

NR= Not reported

LMIC: Low and middle-income Country, HIC: High-income Country

**Table 4: Age Distribution from 91 studies of disease prevalence**

| <b>Age</b>      | <b>Frequency (%)</b> |
|-----------------|----------------------|
| 0 to ≤5 years   | 3149 (36.9)          |
| >5 to ≤10 years | 1668 (19.6)          |
| >10 years       | 3712 (43.5)          |
| Total           | 8529                 |

**Table 5: Age Distribution from 67 case series of clinical features and outcomes**

|                                        | Age bands       |                 |                 |
|----------------------------------------|-----------------|-----------------|-----------------|
|                                        | 0 to ≤5 years   | >5 to ≤10 years | >10 years       |
| <b>Clinical features</b> Frequency (%) |                 |                 |                 |
| Fever                                  | 99/181 (54.7)   | 87/133 (65.4)   | 60/132 (45.4)   |
| Asymptomatic                           | 43/1053 (4.0)   | 45/654 (7.0)    | 48/880 (5.4)    |
| Cough                                  | 46/181 (25.4)   | 33/133 (24.8)   | 23/132 (17.4)   |
| Nasal symptoms/sore throat             | 22/181 (12.1)   | 16/133 (12.0)   | 5/132 (3.8)     |
| Dyspnea                                | 15/181 (8.3)    | 10/133 (7.5)    | 13/132 (9.9)    |
| Diarrhea                               | 29/181 (16.0)   | 48/133 (36.1)   | 36/132 (27.3)   |
| Nausea and vomiting                    | 29/181 (16.0)   | 40/133 (30.0)   | 33/132 (25.0)   |
| Abdominal pain                         | 27/181 (15.0)   | 47/133 (35.3)   | 30/132 (22.7)   |
| Fatigue                                | 13/181 (7.2)    | 7/133 (5.2)     | 5/132 (3.8)     |
| Neurological signs                     | 8/181 (4.4)     | 21/133 (15.8)   | 16/132 (12.1)   |
| Kawasaki signs                         | 15/181 (8.3)    | 24/133 (18.0)   | 8/132 (6.0)     |
| Rash                                   | 24/181 (13.2)   | 27/133 (20.3)   | 20/132 (15.1)   |
| Conjunctivitis                         | 23/181 (12.7)   | 8/133 (6.0)     | 18/132 (13.6)   |
| <b>Outcomes</b> Frequency (%)          |                 |                 |                 |
| Recovered                              | 176/196 (89.8)  | 119/127 (93.7)  | 146/160 (91.2)  |
| Severe/ICU admission                   | 188/1708 (11.0) | 102/834 (12.2)  | 131/1134 (11.6) |
| Not yet discharged                     | 19/196 (9.7)    | 6/127 (4.7)     | 8/160 (5.0)     |
| Deaths                                 | 1/1360 (0.07)   | 2/742 (0.3)     | 11/908 (1.2)    |

**Table 6: Clinical symptoms among MISC from 31 studies**

| <b>Characteristics</b>     | <b>Events/total patients</b> | <b>Mean proportion % (95% CI)</b> |
|----------------------------|------------------------------|-----------------------------------|
| Comorbidity                | 264/1182                     | 24.7 (20.1-29.9)                  |
| Fever                      | 1008/1208                    | 94.2 (88.7-97.1)                  |
| Kawasaki shock/sign        | 708/1208                     | 68.0 (56.0-78.1)                  |
| Abdominal pain             | 313/548                      | 58.1 (49.6-66.1)                  |
| Diarrhea                   | 308/563                      | 54.0 (45.9-61.9)                  |
| Conjunctivitis             | 461/1163                     | 49.2 (40.2-58.2)                  |
| Nausea/vomiting            | 280/563                      | 48.7 (38.5-59.0)                  |
| Rashes                     | 540/1163                     | 46.5 (43.4-49.7)                  |
| Dyspnea                    | 220/1181                     | 22.4 (17.1-28.8)                  |
| Neurological symptoms      | 184/1206                     | 19.0 (12.8-27.3)                  |
| Fatigue                    | 104/626                      | 16.3 (9.6-26.3)                   |
| Cough                      | 94/766                       | 15.1 (10.1-22.2)                  |
| Nasal symptoms             | 310/1124                     | 12.1 (6.9-20.5)                   |
| Pharyngeal erythema        | 298/1099                     | 10.3 (5.5-18.6)                   |
| <b>Clinical management</b> |                              |                                   |
| IVIG                       | 618/1207                     | 69.1 (55.1-80.4)                  |
| Inotropes                  | 255/934                      | 45.5 (34.3-57.2)                  |
| Antibiotics                | 317/1021                     | 38.6 (19.9-61.3)                  |
| Aspirin                    | 201/951                      | 31.7 (19.5-47.1)                  |
| Systemic steroids          | 522/1207                     | 52.9 (41.6-63.8)                  |
| Mechanical ventilation     | 208/1204                     | 20.2 (13.9-28.4)                  |
| Antimalarial               | 60/954                       | 7.3 (3.0-16.8)                    |
| Antiviral                  | 63/1015                      | 6.9 (3.8-12.4)                    |
| <b>Clinical outcomes</b>   |                              |                                   |
| Recovered                  | 1099/1208                    | 91.8 (86.8-95.1)                  |
| ICU admission              | 638/1208                     | 47.1 (43.1-51.1)                  |
| Deaths                     | 39/1208                      | 4.8 (3.6-6.3)                     |

**Table 7: Clinical symptoms among neonates from 11 studies**

| <b>Characteristics</b>     | <b>Events/total patients</b> | <b>Mean proportion % (95% CI)</b> |
|----------------------------|------------------------------|-----------------------------------|
| Comorbidity                | 53/184                       | 28.0 (16.5-43.3)                  |
| Fever                      | 90/184                       | 47.6 (35.8-59.7)                  |
| Dyspnea                    | 50/146                       | 39.1 (22.1-59.2)                  |
| Inability to feed/Lethargy | 62/158                       | 35.4 (16.7-59.9)                  |
| Nausea/vomiting            | 38/146                       | 34.4 (25.9-44.0)                  |
| Nasal symptoms             | 36/146                       | 29.9 (22.3-38.9)                  |
| Cough                      | 28/158                       | 19.2 (13.6-26.3)                  |
| Asymptomatic               | 21/146                       | 16.6 (11.2-23.9)                  |
| Pharyngeal erythema        | 8/146                        | 11.4 (4.8-24.9)                   |
| Diarrhea                   | 8/146                        | 7.6 (4.1-13.4)                    |
| Neurological symptoms      | 5/146                        | 7.3 (3.8-13.5)                    |
| Rashes                     | 3/146                        | 5.3 (2.4-11.0)                    |
| <b>Clinical management</b> |                              |                                   |
| Antibiotics                | 86/166                       | 48.7 (39.6-58.0)                  |
| Mechanical ventilation     | 8/140                        | 10.7 (5.2-20.8)                   |
| Antimalarial               | 6/140                        | 9.6 (5.1-17.6)                    |
| Antiviral                  | 3/140                        | 6.4 (3.0-12.9)                    |
| IVIG                       | 2/140                        | 6.3 (2.4-15.4)                    |
| Inotropes                  | 2/140                        | 6.3 (2.4-15.4)                    |
| Systemic steroids          | 2/140                        | 6.3 (2.4-15.4)                    |
| <b>Clinical outcomes</b>   |                              |                                   |
| Recovered                  | 146/184                      | 77.8 (55.7-90.7)                  |
| ICU admission              | 22/184                       | 16.0 (7.6-30.7)                   |
| Deaths                     | 7/184                        | 8.8 (4.9-15.3)                    |

**Table 8: Quality assessment of included studies (N=129)**

| Study and year  | Was the study question or objective clearly stated? | Was the study population clearly and fully described, including a case definition? | Were the cases consecutive? | Were the subjects comparable? | Was the intervention clearly described? | Were the outcome measures clearly defined, valid, reliable, and implemented consistently across all study participants? | Was the length of follow-up adequate? | Were the statistical methods well described? | Were the results well described? | Overall Quality (Good, fair or poor) |
|-----------------|-----------------------------------------------------|------------------------------------------------------------------------------------|-----------------------------|-------------------------------|-----------------------------------------|-------------------------------------------------------------------------------------------------------------------------|---------------------------------------|----------------------------------------------|----------------------------------|--------------------------------------|
| Qiu, H 2020     | Yes                                                 | Yes                                                                                | No                          | Yes                           | NA                                      | Yes                                                                                                                     | Yes                                   | Yes                                          | Yes                              | 7                                    |
| Wang, D 2020    | Yes                                                 | Yes                                                                                | Yes                         | Yes                           | NA                                      | Yes                                                                                                                     | Yes                                   | Yes                                          | Yes                              | 8                                    |
| Zheng, F 2020   | Yes                                                 | Yes                                                                                | No                          | Yes                           | NA                                      | Yes                                                                                                                     | No                                    | Yes                                          | No                               | 5                                    |
| Xia, W 2020     | Yes                                                 | Yes                                                                                | No                          | Yes                           | NA                                      | Yes                                                                                                                     | Yes                                   | Yes                                          | No                               | 6                                    |
| Feng, K 2020    | Yes                                                 | Yes                                                                                | No                          | Yes                           | NA                                      | Yes                                                                                                                     | Yes                                   | Yes                                          | No                               | 6                                    |
| Cai, J 2020     | Yes                                                 | Yes                                                                                | No                          | Yes                           | NA                                      | Yes                                                                                                                     | Yes                                   | Yes                                          | No                               | 6                                    |
| Wei, M 2020     | Yes                                                 | Yes                                                                                | No                          | Yes                           | NA                                      | Yes                                                                                                                     | Yes                                   | Yes                                          | Yes                              | 7                                    |
| Su, L 2020      | Yes                                                 | Yes                                                                                | No                          | Yes                           | NA                                      | Yes                                                                                                                     | No                                    | Yes                                          | Yes                              | 6                                    |
| Zhou, Y 2020    | Yes                                                 | Yes                                                                                | No                          | Yes                           | NA                                      | Yes                                                                                                                     | No                                    | Yes                                          | Yes                              | 6                                    |
| Sun, D 2020     | Yes                                                 | Yes                                                                                | No                          | Yes                           | NA                                      | Yes                                                                                                                     | Yes                                   | Yes                                          | Yes                              | 7                                    |
| Liu, W 2020     | Yes                                                 | Yes                                                                                | No                          | Yes                           | NA                                      | Yes                                                                                                                     | No                                    | Yes                                          | Yes                              | 6                                    |
| Hu, Z 2020      | Yes                                                 | Yes                                                                                | Yes                         | Yes                           | NA                                      | Yes                                                                                                                     | Yes                                   | Yes                                          | Yes                              | 8                                    |
| Liu, M 2020     | Yes                                                 | Yes                                                                                | No                          | Yes                           | NA                                      | Yes                                                                                                                     | Yes                                   | Yes                                          | Yes                              | 7                                    |
| Liu, H 2020     | Yes                                                 | No                                                                                 | Yes                         | Yes                           | NA                                      | Yes                                                                                                                     | No                                    | Yes                                          | No                               | 5                                    |
| Lou, MX 2020    | Yes                                                 | Yes                                                                                | No                          | Yes                           | NA                                      | Yes                                                                                                                     | Yes                                   | Yes                                          | Yes                              | 7                                    |
| Zhang, T 2020   | Yes                                                 | No                                                                                 | No                          | Yes                           | NA                                      | Yes                                                                                                                     | Yes                                   | Yes                                          | Yes                              | 6                                    |
| Li, Y 2020      | Yes                                                 | Yes                                                                                | No                          | Yes                           | NA                                      | Yes                                                                                                                     | No                                    | Yes                                          | Yes                              | 6                                    |
| Ji, LN 2020     | Yes                                                 | Yes                                                                                | No                          | Yes                           | NA                                      | Yes                                                                                                                     | Yes                                   | Yes                                          | Yes                              | 7                                    |
| Tagarro, A 2020 | Yes                                                 | Yes                                                                                | No                          | Yes                           | NA                                      | Yes                                                                                                                     | Yes                                   | Yes                                          | Yes                              | 7                                    |
| Chen, A 2020    | Yes                                                 | Yes                                                                                | No                          | Yes                           | NA                                      | Yes                                                                                                                     | No                                    | Yes                                          | No                               | 5                                    |
| See, KC 2020    | Yes                                                 | Yes                                                                                | Yes                         | Yes                           | NA                                      | Yes                                                                                                                     | Yes                                   | Yes                                          | Yes                              | 8                                    |

|                           |     |     |     |     |    |     |     |     |     |   |
|---------------------------|-----|-----|-----|-----|----|-----|-----|-----|-----|---|
| Zhang, GX 2020            | Yes | Yes | No  | Yes | NA | Yes | Yes | Yes | Yes | 7 |
| Cheng, X 2020             | Yes | Yes | No  | Yes | NA | Yes | Yes | Yes | Yes | 7 |
| Tang, A 2020              | Yes | Yes | No  | Yes | NA | Yes | Yes | Yes | Yes | 7 |
| Zhu, L 2020               | Yes | Yes | Yes | Yes | NA | Yes | Yes | Yes | Yes | 8 |
| Tan, X 2020               | Yes | Yes | Yes | Yes | NA | Yes | Yes | Yes | Yes | 8 |
| Ma, H 2020                | Yes | Yes | Yes | Yes | NA | Yes | Yes | Yes | No  | 7 |
| Shen, Q 2020              | Yes | Yes | Yes | Yes | NA | Yes | Yes | Yes | No  | 7 |
| Schwierzeck, V 2020       | Yes | No  | Yes | Yes | NA | Yes | No  | Yes | No  | 5 |
| Jiang, JY 2020            | Yes | Yes | Yes | Yes | NA | Yes | Yes | Yes | Yes | 8 |
| Riphagen, S 2020          | Yes | No  | Yes | Yes | NA | Yes | Yes | Yes | Yes | 7 |
| Shekerdeman, LS 2020      | Yes | Yes | Yes | Yes | NA | Yes | Yes | Yes | Yes | 8 |
| Verdoni, L 2020           | Yes | No  | Yes | Yes | NA | Yes | Yes | Yes | Yes | 7 |
| Rahimzadeh, G 2020        | Yes | No  | Yes | Yes | NA | Yes | Yes | Yes | Yes | 7 |
| Tullie, L 2020            | Yes | No  | No  | Yes | NA | Yes | Yes | Yes | Yes | 6 |
| Sajid, MI 2020            | Yes | Yes | Yes | Yes | NA | Yes | No  | Yes | Yes | 7 |
| Zhang, ZJ 2020            | Yes | Yes | Yes | Yes | NA | Yes | Yes | Yes | No  | 7 |
| Zeng, L 2020              | Yes | Yes | Yes | Yes | NA | Yes | No  | Yes | Yes | 7 |
| Salvatori, G 2020         | Yes | Yes | Yes | Yes | NA | Yes | Yes | Yes | Yes | 8 |
| Zhang, X 2020             | Yes | Yes | Yes | Yes | NA | Yes | Yes | Yes | Yes | 8 |
| Wu, HP 2020               | Yes | Yes | Yes | Yes | NA | Yes | Yes | Yes | Yes | 8 |
| Zhang, H 2020             | Yes | Yes | No  | Yes | NA | Yes | Yes | Yes | Yes | 7 |
| Chao, JY 2020             | Yes | Yes | Yes | Yes | NA | Yes | Yes | Yes | Yes | 8 |
| Eghbali, A 2020           | Yes | Yes | Yes | Yes | NA | Yes | Yes | Yes | Yes | 8 |
| Chiotos, K 2020           | Yes | Yes | Yes | Yes | NA | Yes | Yes | Yes | Yes | 8 |
| Flores, V 2020            | Yes | Yes | No  | Yes | NA | Yes | Yes | Yes | Yes | 7 |
| García-Salido, A 2020     | Yes | Yes | No  | Yes | NA | Yes | Yes | Yes | Yes | 7 |
| Cabrero-Hernández, M 2020 | Yes | Yes | No  | Yes | NA | Yes | Yes | Yes | Yes | 7 |
| Waltuch, T 2020           | Yes | Yes | No  | Yes | NA | Yes | Yes | Yes | Yes | 7 |

|                      |     |     |     |     |    |     |     |     |     |   |
|----------------------|-----|-----|-----|-----|----|-----|-----|-----|-----|---|
| Kakuya, F 2020       | Yes | Yes | No  | Yes | NA | Yes | Yes | Yes | Yes | 7 |
| Soltani, J 2020      | Yes | Yes | No  | Yes | NA | Yes | Yes | Yes | Yes | 7 |
| Toubiana, J 2020     | Yes | Yes | No  | Yes | NA | Yes | Yes | Yes | Yes | 7 |
| Foster, CE 2020      | Yes | Yes | No  | Yes | NA | Yes | Yes | Yes | Yes | 7 |
| White, A 2020        | Yes | Yes | No  | Yes | NA | Yes | Yes | Yes | Yes | 7 |
| Lin, EE 2020         | Yes | Yes | No  | Yes | NA | Yes | No  | Yes | No  | 5 |
| Gao, Y 2020          | Yes | Yes | No  | Yes | NA | Yes | Yes | Yes | Yes | 7 |
| Harman, K 2020       | Yes | Yes | No  | Yes | NA | Yes | Yes | Yes | Yes | 7 |
| Blondiaux, E 2020    | Yes | Yes | No  | Yes | NA | Yes | Yes | Yes | Yes | 7 |
| Pouletty, M 2020     | Yes | Yes | No  | Yes | NA | Yes | Yes | Yes | Yes | 7 |
| Whittaker, E 2020    | Yes | Yes | No  | Yes | NA | Yes | Yes | Yes | Yes | 7 |
| Cheung, EW 2020      | Yes | Yes | No  | Yes | NA | Yes | Yes | Yes | Yes | 7 |
| Lu, X 2020           | Yes | Yes | Yes | Yes | NA | Yes | Yes | Yes | No  | 7 |
| CDC, COVID 2020      | Yes | Yes | Yes | Yes | NA | Yes | Yes | Yes | Yes | 8 |
| Gotzinger, F 2020    | Yes | Yes | Yes | Yes | NA | Yes | Yes | Yes | No  | 7 |
| Dong, Y 2020         | Yes | Yes | Yes | Yes | NA | Yes | Yes | Yes | No  | 7 |
| Abdel-Mannan, O 2020 | Yes | Yes | Yes | Yes | NA | Yes | Yes | Yes | Yes | 8 |
| Guha, A 2020         | Yes | Yes | Yes | Yes | NA | Yes | No  | Yes | Yes | 7 |
| Bhumbra, S 2020      | Yes | Yes | Yes | Yes | NA | Yes | Yes | Yes | Yes | 8 |
| Bisogno, G 2020      | Yes | Yes | Yes | Yes | NA | Yes | Yes | Yes | Yes | 8 |
| Blumfield, E 2020    | Yes | Yes | No  | Yes | NA | Yes | No  | Yes | Yes | 6 |
| Derespina, KR 2020   | Yes | Yes | Yes | Yes | NA | Yes | Yes | Yes | Yes | 8 |
| Feldstein, LR 2020   | Yes | Yes | No  | Yes | NA | Yes | No  | Yes | Yes | 6 |



|                           |     |     |     |     |    |     |     |     |     |   |
|---------------------------|-----|-----|-----|-----|----|-----|-----|-----|-----|---|
| George, S 2020            | Yes | Yes | Yes | Yes | NA | Yes | No  | Yes | Yes | 7 |
| Gonzalez-Cortes, R 2020   | Yes | Yes | Yes | Yes | NA | Yes | Yes | Yes | Yes | 8 |
| Kainth, MK 2020           | Yes | Yes | Yes | Yes | NA | Yes | Yes | Yes | Yes | 8 |
| Kaushik, S 2020           | Yes | Yes | Yes | Yes | NA | Yes | No  | Yes | Yes | 7 |
| Kest, H 2020              | Yes | Yes | Yes | Yes | NA | Yes | Yes | Yes | Yes | 8 |
| Korkmaz, MF 2020          | Yes | Yes | No  | Yes | NA | Yes | Yes | Yes | Yes | 7 |
| Meslin, P 2020            | Yes | Yes | Yes | Yes | NA | Yes | Yes | Yes | Yes | 8 |
| Moraleda, C 2020          | Yes | Yes | No  | Yes | NA | Yes | Yes | Yes | No  | 6 |
| Foong, Ng 2020            | Yes | Yes | No  | Yes | NA | Yes | No  | Yes | Yes | 6 |
| Pacquette, D 2020         | Yes | Yes | No  | Yes | NA | Yes | Yes | Yes | Yes | 7 |
| Parri, N 2020             | Yes | Yes | Yes | Yes | NA | Yes | Yes | Yes | No  | 7 |
| Perez, A 2020             | Yes | Yes | No  | Yes | NA | Yes | Yes | Yes | No  | 6 |
| Sarangi, B 2020           | Yes | Yes | Yes | Yes | NA | Yes | No  | Yes | No  | 6 |
| Sadiq, M 2020             | Yes | Yes | No  | Yes | NA | Yes | Yes | Yes | Yes | 7 |
| Swann, OV 2020            | Yes | Yes | Yes | Yes | NA | Yes | No  | Yes | Yes | 7 |
| Antunez-Montez, O 2020    | Yes | Yes | Yes | Yes | NA | Yes | Yes | Yes | Yes | 8 |
| Capone, C 2020            | Yes | Yes | Yes | Yes | NA | Yes | Yes | Yes | Yes | 8 |
| Cura Yayla, B 2020        | Yes | Yes | Yes | Yes | NA | Yes | No  | Yes | No  | 6 |
| Davies, P 2020            | Yes | Yes | Yes | Yes | NA | Yes | Yes | Yes | Yes | 8 |
| de Farias, E 2020         | Yes | Yes | Yes | Yes | NA | Yes | Yes | Yes | Yes | 8 |
| Dima, M 2020              | Yes | Yes | No  | Yes | NA | Yes | Yes | Yes | Yes | 7 |
| Han, M 2020               | Yes | Yes | Yes | Yes | NA | Yes | Yes | Yes | Yes | 8 |
| Ibrahim, L 2020           | Yes | Yes | Yes | Yes | NA | Yes | Yes | Yes | Yes | 8 |
| Kilani, M 2020            | Yes | Yes | Yes | Yes | NA | Yes | Yes | Yes | Yes | 8 |
| Okarska-Napierala, P 2020 | Yes | Yes | Yes | Yes | NA | Yes | No  | Yes | No  | 6 |

|                          |     |     |     |     |    |     |     |     |     |   |
|--------------------------|-----|-----|-----|-----|----|-----|-----|-----|-----|---|
| Mahmoudi, S 2020         | Yes | Yes | Yes | Yes | NA | Yes | Yes | Yes | Yes | 8 |
| Mamishi, S 2020          | Yes | Yes | Yes | Yes | NA | Yes | Yes | Yes | Yes | 8 |
| Mithal, L 2020           | Yes | Yes | No  | Yes | NA | Yes | Yes | Yes | Yes | 7 |
| Newman, A 2020           | Yes | Yes | No  | Yes | NA | Yes | Yes | Yes | Yes | 7 |
| Torres, J 2020           | Yes | Yes | Yes | Yes | NA | Yes | Yes | Yes | Yes | 8 |
| Saha, S 2020             | Yes | Yes | No  | Yes | NA | Yes | No  | Yes | No  | 5 |
| Gale, C 2020             | Yes | Yes | Yes | Yes | NA | Yes | No  | Yes | No  | 6 |
| Schwartz, D 2020         | Yes | Yes | No  | Yes | NA | Yes | No  | Yes | No  | 5 |
| Schwartz, S 2020         | Yes | Yes | No  | Yes | NA | Yes | Yes | Yes | Yes | 7 |
| Jain, S 2020             | Yes | Yes | Yes | Yes | NA | Yes | Yes | Yes | Yes | 8 |
| Webb, K 2020             | Yes | No  | No  | Yes | NA | Yes | No  | Yes | Yes | 5 |
| van der Zalm, M 2020     | Yes | Yes | Yes | Yes | NA | Yes | No  | Yes | No  | 6 |
| Sethuraman, U 2020       | Yes | Yes | Yes | Yes | NA | Yes | Yes | Yes | Yes | 8 |
| Onal, P 2020             | Yes | Yes | Yes | Yes | NA | Yes | Yes | Yes | Yes | 8 |
| Rabha, A 2020            | Yes | Yes | Yes | Yes | NA | Yes | Yes | Yes | Yes | 8 |
| Shahbaznejad, L 2020     | Yes | No  | No  | Yes | NA | Yes | Yes | Yes | Yes | 6 |
| Storch-de-Garcia, P 2020 | Yes | Yes | No  | Yes | NA | Yes | Yes | Yes | Yes | 7 |
| García-Salido, A 2020    | Yes | Yes | No  | Yes | NA | Yes | No  | Yes | Yes | 6 |
| Lima-setta, F 2020       | Yes | Yes | No  | Yes | NA | Yes | No  | Yes | Yes | 6 |
| Zachariah, P 2020        | Yes | Yes | No  | Yes | NA | Yes | No  | Yes | Yes | 6 |
| Kalamdani, P 2020        | Yes | Yes | Yes | Yes | NA | Yes | Yes | Yes | No  | 7 |
| Colomer, B 2020          | Yes | Yes | Yes | Yes | NA | Yes | Yes | Yes | Yes | 8 |

|                        |     |     |     |     |    |     |     |     |     |   |
|------------------------|-----|-----|-----|-----|----|-----|-----|-----|-----|---|
| Dhanalakhmsi, K 2020   | Yes | Yes | No  | Yes | NA | Yes | Yes | Yes | Yes | 7 |
| Falah, N 2020          | Yes | Yes | No  | Yes | NA | Yes | Yes | Yes | Yes | 7 |
| Zheng, G 2020          | Yes | No  | Yes | Yes | NA | Yes | Yes | Yes | Yes | 7 |
| Almoosa, Z 2020        | Yes | Yes | No  | Yes | NA | Yes | Yes | Yes | Yes | 7 |
| Alsharrah, D 2020      | Yes | Yes | Yes | Yes | NA | Yes | Yes | Yes | No  | 7 |
| Prata-Barbosa, A 2020  | Yes | Yes | Yes | Yes | NA | Yes | No  | Yes | Yes | 7 |
| Bayesheva, D 2020      | Yes | Yes | Yes | Yes | NA | Yes | Yes | Yes | No  | 7 |
| Bustos-Cordova, E 2020 | Yes | Yes | Yes | Yes | NA | Yes | Yes | Yes | No  | 7 |
| Bhavsar, M 2020        | Yes | Yes | No  | Yes | NA | Yes | No  | Yes | Yes | 6 |
| Montoya, J 2020        | Yes | No  | Yes | Yes | NA | Yes | No  | Yes | Yes | 6 |

Figure1: Flow diagram of the systematic review process

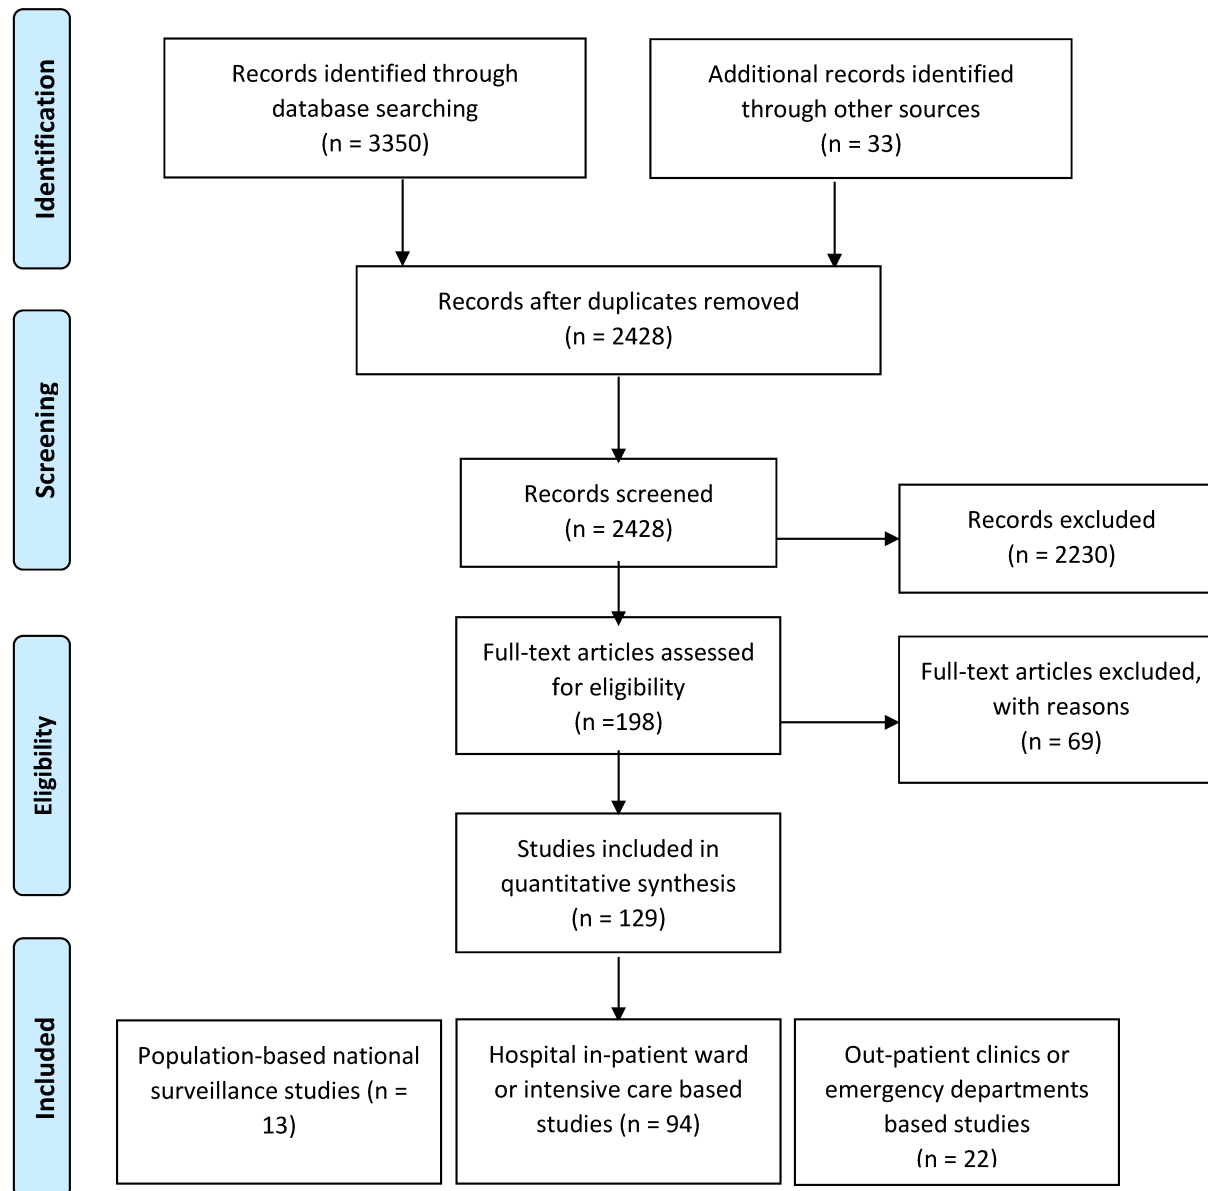

**Figure 2: Global map of distribution of the studies included (N=129) in the review**

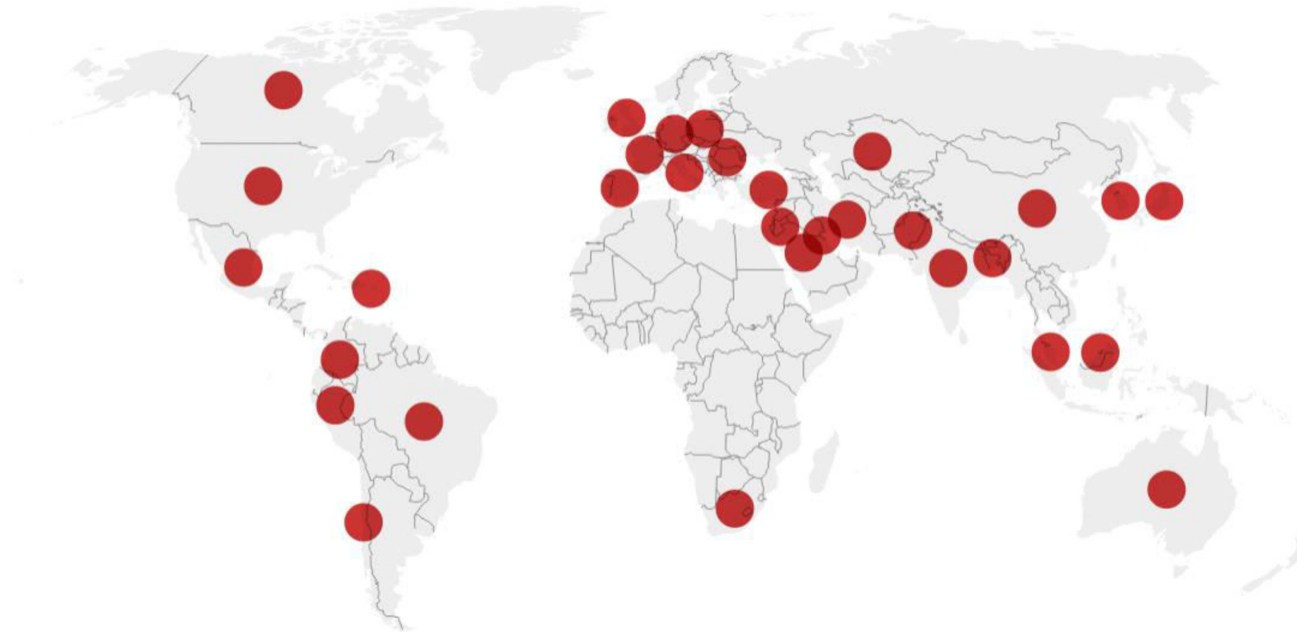

Created by Datawrapper <https://www.datawrapper.de/>
